# Supplementary material for: A series of selective and sensitive fluorescent sensors based on a thiophen-2-yl-benzothiazole unit for Hg2+
Source: Royal Society of Chemistry journal article supplement (doi:10.1039/c5nj02259b), 2016-01-01
Supplement: c5nj02259b1.pdf [file c5nj02259b1.pdf]

## Supporting Information

### A series of selective and sensitive fluorescent sensor based on thiophen-2-yl-benzothiazole unit for $\text{Hg}^{2+}$

Qunbo Mei,<sup>a\*</sup> Ruqiang Tian,<sup>a</sup> Yujie Shi,<sup>a</sup> Qingfang Hua,<sup>a</sup> Chen Chen,<sup>a</sup> Bihai Tong,<sup>b\*</sup>

<sup>a</sup> Key Laboratory for Organic Electronics & Information Displays (KLOEID), Institute of Advanced Materials (IAM), Nanjing University of Posts and Telecommunications (NUPT), Nanjing 210046, China;

<sup>b</sup> Institute of Molecular Engineering and Applied Chemistry, College of Metallurgy and Resources, Anhui University of Technology, Ma'anshan, Anhui 243002, P. R. China.

#### Contents:

#### 1. Supplementary spectra data (Figure S1- Figure S8)

#### 2. Theoretical calculations data (Table S1- Table S5)

#### 3. GC-MS, MALDI-TOF mass, IR and NMR data (Figure S9- Figure S45)

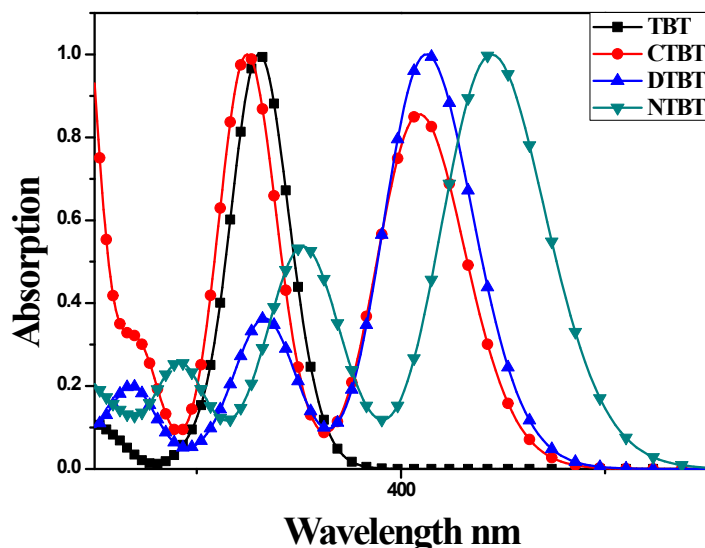

**Figure S1.** UV-vis spectra of compounds TBT, CTBT, DTBT, and NTBT by density functional theory (DFT) in dichloromethane solution.

**Table S1.** The HOMO and LUMO distributions of TBT, CTBT, DTBT, and NTBT

| Molecular Structure                                                                | LUMO                                                                               | HOMO                                                                                 |
|------------------------------------------------------------------------------------|------------------------------------------------------------------------------------|--------------------------------------------------------------------------------------|
| 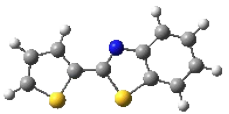  |   |   |
|   |   |   |
|   |   |   |
|  |  |  |

**Table S2.** The optimized geometry of TBT in ground state at B3LYP/6-31G(d)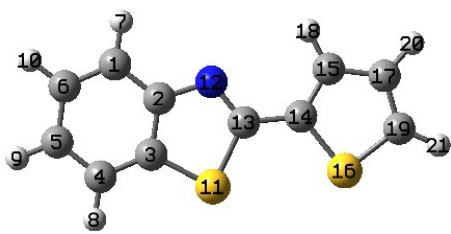

| Center number | Atom | Coordinates |             |             |
|---------------|------|-------------|-------------|-------------|
|               |      | X           | Y           | Z           |
| 1             | C    | -2.87587500 | 1.60385400  | 0.00015800  |
| 2             | C    | -1.76276900 | 0.74869800  | 0.00000500  |
| 3             | C    | -1.96408000 | -0.65482800 | -0.00007900 |
| 4             | C    | -3.24510700 | -1.20923300 | 0.00002200  |
| 5             | C    | -4.33504100 | -0.34157400 | 0.00009200  |
| 6             | C    | -4.15077400 | 1.05211300  | 0.00015200  |
| 7             | H    | -2.71858700 | 2.67776900  | 0.00014700  |
| 8             | H    | -3.39160900 | -2.28506100 | 0.00006300  |
| 9             | H    | -5.34131300 | -0.75083900 | 0.00014300  |
| 10            | H    | -5.01860800 | 1.70552400  | 0.00017900  |
| 11            | S    | -0.40749100 | -1.45985000 | -0.00028000 |

|    |   |             |             |             |
|----|---|-------------|-------------|-------------|
| 12 | N | -0.44546800 | 1.16226400  | -0.00007700 |
| 13 | C | 0.37268700  | 0.15082900  | -0.00004100 |
| 14 | C | 1.81628100  | 0.29883300  | -0.00013800 |
| 15 | C | 2.51116300  | 1.49003100  | -0.00008100 |
| 16 | S | 2.91940800  | -1.06077400 | 0.00029300  |
| 17 | C | 3.92054800  | 1.31429400  | -0.00016200 |
| 18 | H | 2.00429300  | 2.44731700  | -0.00024500 |
| 19 | C | 4.29170800  | -0.00491600 | 0.00011700  |
| 20 | H | 4.63135200  | 2.13329400  | -0.00041100 |
| 21 | H | 5.28961600  | -0.42248100 | 0.00017600  |

**Table S3.** The optimized geometry of CTBT in ground state at B3LYP/6-31G(d)

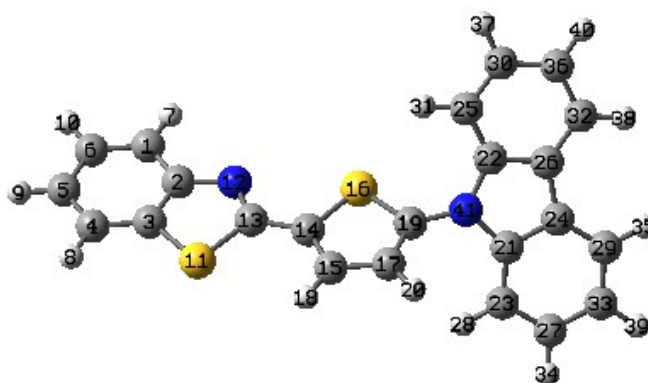

| Center number | Atom | Coordinates |             |             |
|---------------|------|-------------|-------------|-------------|
|               |      | X           | Y           | Z           |
| 1             | C    | -5.39895900 | 1.40241100  | -1.43628800 |
| 2             | C    | 4.62202800  | 0.55418100  | -0.63255900 |
| 3             | C    | -5.26324400 | -0.38199100 | 0.21732500  |
| 4             | C    | -6.65415300 | -0.48185100 | 0.27438300  |
| 5             | C    | -7.40617700 | 0.37021100  | -0.53187100 |
| 6             | C    | -6.78351000 | 1.30329800  | -1.37885800 |
| 7             | H    | -4.90354500 | 2.11726400  | -2.08548600 |
| 8             | H    | -7.13990700 | -1.20072500 | 0.92713300  |
| 9             | H    | -8.49042900 | 0.31011000  | -0.50313300 |
| 10            | H    | -7.39467000 | 1.95510200  | -1.99655000 |
| 11            | S    | -4.04929700 | -1.29589600 | 1.09410900  |
| 12            | N    | -3.24148800 | 0.54426700  | -0.59188700 |
| 13            | C    | -2.79366000 | -0.34497500 | 0.24472700  |
| 14            | C    | -1.38860600 | -0.57845300 | 0.49205200  |
| 15            | C    | -0.78788900 | -1.47106800 | 1.35385100  |
| 16            | S    | -0.19898400 | 0.38288000  | -0.35952100 |
| 17            | C    | 0.62661700  | -1.37825600 | 1.36667600  |
| 18            | H    | -1.34661000 | -2.15876400 | 1.97986200  |
| 19            | C    | 1.10525500  | -0.41797600 | 0.50595500  |

|    |   |            |             |             |
|----|---|------------|-------------|-------------|
| 20 | H | 1.27373800 | -1.97919900 | 1.99487200  |
| 21 | C | 3.40724800 | -1.04487600 | -0.19875200 |
| 22 | C | 3.04961400 | 1.14550700  | 0.32360200  |
| 23 | C | 3.27053100 | -2.40943600 | -0.45546800 |
| 24 | C | 4.63622700 | -0.36767100 | -0.38658100 |
| 25 | C | 2.50305200 | 2.36408500  | 0.72909600  |
| 26 | C | 4.40890900 | 1.02514900  | -0.05478700 |
| 27 | C | 4.39860100 | -3.09931200 | -0.89673400 |
| 28 | H | 2.31981100 | -2.91482200 | -0.32223400 |
| 29 | C | 5.75452600 | -1.08407100 | -0.82760900 |
| 30 | C | 3.34221800 | 3.47717500  | 0.73602600  |
| 31 | H | 1.46433000 | 2.44642900  | 1.03052200  |
| 32 | C | 5.23022800 | 2.15791000  | -0.03772800 |
| 33 | C | 5.63006700 | -2.44788400 | -1.07825300 |
| 34 | H | 4.31972900 | -4.16278100 | -1.10497900 |
| 35 | H | 6.70600600 | -0.58040700 | -0.97617600 |
| 36 | C | 4.69085400 | 3.37970500  | 0.35532300  |
| 37 | H | 2.94111500 | 4.43838300  | 1.04515300  |
| 38 | H | 6.27565200 | 2.08311800  | -0.32519000 |
| 39 | H | 6.49127900 | -3.01461200 | -1.42029000 |
| 40 | H | 5.31793900 | 4.26648900  | 0.37098000  |
| 41 | N | 2.44202100 | -0.11972400 | 0.23916400  |

**Table S4.** The optimized geometry of **DTBT** in ground state at B3LYP/6-31G(d)

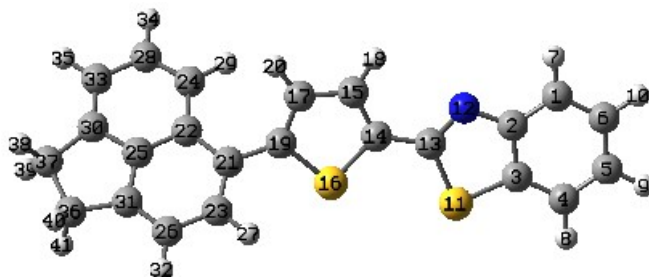

| Center number | Atom | Coordinates |             |             |
|---------------|------|-------------|-------------|-------------|
|               |      | X           | Y           | Z           |
| 1             | C    | 6.31924100  | 1.40212000  | 0.46634600  |
| 2             | C    | 5.15830800  | 0.65483700  | 0.21193200  |
| 3             | C    | 5.27380200  | -0.62662600 | -0.38469800 |
| 4             | C    | 6.51574800  | -1.16424900 | -0.72621900 |
| 5             | C    | 7.65415600  | -0.40486800 | -0.46460900 |
| 6             | C    | 7.55529700  | 0.86674500  | 0.12651700  |
| 7             | H    | 6.22794800  | 2.38262600  | 0.92283600  |
| 8             | H    | 6.59627500  | -2.14613000 | -1.18271000 |
| 9             | H    | 8.63119200  | -0.80384300 | -0.72221900 |
| 10            | H    | 8.45908000  | 1.43777000  | 0.31961900  |

|    |   |             |             |             |
|----|---|-------------|-------------|-------------|
| 11 | S | 3.67535000  | -1.31811800 | -0.57841200 |
| 12 | N | 3.87233000  | 1.06666800  | 0.49712900  |
| 13 | C | 2.99507700  | 0.16841200  | 0.15244300  |
| 14 | C | 1.56890100  | 0.33778400  | 0.34116500  |
| 15 | C | 0.94993800  | 1.41990200  | 0.93309900  |
| 16 | S | 0.38375300  | -0.83999700 | -0.17611500 |
| 17 | C | -0.45951200 | 1.30313900  | 0.97971600  |
| 18 | H | 1.51456100  | 2.25642700  | 1.32705700  |
| 19 | C | -0.94312300 | 0.13167600  | 0.43015200  |
| 20 | H | -1.10583300 | 2.03982800  | 1.44284000  |
| 21 | C | -2.32590600 | -0.35656000 | 0.33826400  |
| 22 | C | -3.40876000 | 0.51177700  | -0.04588900 |
| 23 | C | -2.61315200 | -1.68879500 | 0.63644000  |
| 24 | C | -3.33375800 | 1.87131000  | -0.45635000 |
| 25 | C | -4.70332700 | -0.06243100 | -0.04896700 |
| 26 | C | -3.92020900 | -2.23281600 | 0.60342100  |
| 27 | H | -1.79491600 | -2.33657600 | 0.93916500  |
| 28 | C | -4.48186000 | 2.56415700  | -0.79877900 |
| 29 | H | -2.37068100 | 2.36476000  | -0.52366000 |
| 30 | C | -5.87572300 | 0.64753000  | -0.39457500 |
| 31 | C | -4.97342900 | -1.41138500 | 0.26951300  |
| 32 | H | -4.06720500 | -3.27991600 | 0.85549100  |
| 33 | C | -5.77088900 | 1.96932600  | -0.76470400 |
| 34 | H | -4.39405100 | 3.60083200  | -1.11403600 |
| 35 | H | -6.64334300 | 2.55620200  | -1.04113200 |
| 36 | C | -6.46501900 | -1.66333500 | 0.14937800  |
| 37 | C | -7.07053200 | -0.28343500 | -0.28087500 |
| 38 | H | -7.79372400 | 0.08304400  | 0.45780300  |
| 39 | H | -7.61188800 | -0.36131700 | -1.23128200 |
| 40 | H | -6.89157200 | -2.01234500 | 1.09757300  |
| 41 | H | -6.67940900 | -2.44348800 | -0.59116000 |

**Table S5.** The optimized geometry of **NTBT** in ground state at B3LYP/6-31G(d)

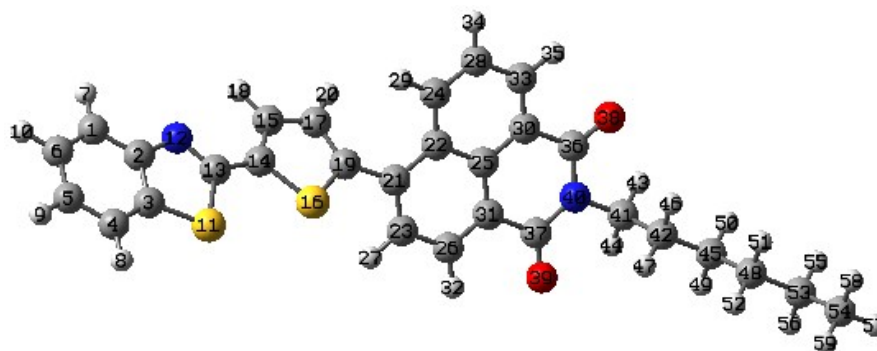

| Center | Atom | Coordinates |
|--------|------|-------------|
|--------|------|-------------|

| number |   | X           | Y           | Z           |
|--------|---|-------------|-------------|-------------|
| 1      | C | 9.15789200  | 0.56046200  | -0.17306000 |
| 2      | C | 7.87368000  | -0.00714700 | -0.17553300 |
| 3      | C | 7.72541200  | -1.39285400 | -0.43864800 |
| 4      | C | 8.82776100  | -2.20930500 | -0.69722500 |
| 5      | C | 10.09195600 | -1.62453900 | -0.68941400 |
| 6      | C | 10.25446800 | -0.25217000 | -0.42942600 |
| 7      | H | 9.26778600  | 1.62119800  | 0.02870300  |
| 8      | H | 8.70724800  | -3.26936100 | -0.89827900 |
| 9      | H | 10.96426000 | -2.24081400 | -0.88754400 |
| 10     | H | 11.25242900 | 0.17670700  | -0.42972700 |
| 11     | S | 6.02582300  | -1.81362000 | -0.37214400 |
| 12     | N | 6.70233200  | 0.68275000  | 0.06185200  |
| 13     | C | 5.66572200  | -0.10157000 | -0.00314600 |
| 14     | C | 4.30942900  | 0.36518000  | 0.21237100  |
| 15     | C | 3.93682700  | 1.65251000  | 0.54222600  |
| 16     | S | 2.90688300  | -0.66661000 | 0.06858100  |
| 17     | C | 2.53769700  | 1.81079200  | 0.67981700  |
| 18     | H | 4.66610400  | 2.44046300  | 0.68578700  |
| 19     | C | 1.82069000  | 0.65020500  | 0.46229400  |
| 20     | H | 2.06704700  | 2.74212400  | 0.97388800  |
| 21     | C | 0.37584700  | 0.40799700  | 0.58165400  |
| 22     | C | -0.59335000 | 1.30957500  | 0.01435600  |
| 23     | C | -0.07262500 | -0.71501800 | 1.27243700  |
| 24     | C | -0.25209800 | 2.42528900  | -0.79567600 |
| 25     | C | -1.98321900 | 1.05237200  | 0.24385900  |
| 26     | C | -1.43939400 | -0.96789000 | 1.46624300  |
| 27     | H | 0.65549700  | -1.39253600 | 1.70773200  |
| 28     | C | -1.22354800 | 3.26354500  | -1.30607900 |
| 29     | H | 0.78976200  | 2.60606000  | -1.03278600 |
| 30     | C | -2.96257300 | 1.93398200  | -0.28302100 |
| 31     | C | -2.38949100 | -0.09043700 | 0.97741900  |
| 32     | H | -1.77088600 | -1.83978600 | 2.02014800  |
| 33     | C | -2.58535500 | 3.02803200  | -1.04015200 |
| 34     | H | -0.93562800 | 4.10635700  | -1.92754000 |
| 35     | H | -3.35858100 | 3.68052800  | -1.43168200 |
| 36     | C | -4.40837000 | 1.69140200  | -0.04129600 |
| 37     | C | -3.82623800 | -0.36725100 | 1.22394600  |
| 38     | O | -5.27853600 | 2.43248800  | -0.48016900 |
| 39     | O | -4.20700400 | -1.35626200 | 1.83742500  |
| 40     | N | -4.74568300 | 0.56594100  | 0.72410200  |
| 41     | C | -6.17776900 | 0.31600000  | 0.97614300  |
| 42     | C | -6.83248800 | -0.52832600 | -0.12241700 |
| 43     | H | -6.65974100 | 1.29235600  | 1.04614900  |

|    |   |              |             |             |
|----|---|--------------|-------------|-------------|
| 44 | H | -6.24260400  | -0.19304100 | 1.93896400  |
| 45 | C | -8.31642100  | -0.79128500 | 0.16296500  |
| 46 | H | -6.72494800  | -0.00717100 | -1.08198200 |
| 47 | H | -6.29574700  | -1.48191200 | -0.20433900 |
| 48 | C | -9.00400400  | -1.62039000 | -0.92941600 |
| 50 | H | -8.41524200  | -1.30931300 | 1.12828200  |
| 51 | H | -8.84254800  | 0.16832300  | 0.27436500  |
| 52 | H | -8.91192800  | -1.09807600 | -1.89321700 |
| 53 | H | -8.47214400  | -2.57589500 | -1.04937200 |
| 54 | C | -10.48543900 | -1.89894500 | -0.64452400 |
| 55 | C | -11.16757700 | -2.72051500 | -1.74315100 |
| 56 | H | -11.01576600 | -0.94420300 | -0.51886200 |
| 57 | H | -10.57598300 | -2.42547900 | 0.31624300  |
| 58 | H | -12.22208900 | -2.90572500 | -1.50858500 |
| 59 | H | -11.12742300 | -2.20164800 | -2.70890300 |
| 60 | H | -10.67893400 | -3.69432600 | -1.87142400 |

**Table S6.** The frontier molecular orbital energies of **TBT**, **CTBT**, **DTBT**, and **NTBT**.

| Molecular   | LUMO     | HOMO     |
|-------------|----------|----------|
| <b>TBT</b>  | -1.73 eV | -5.86 eV |
| <b>CTBT</b> | -1.90 eV | -5.45 eV |
| <b>DTBT</b> | -1.82 eV | -5.33 eV |
| <b>NTBT</b> | -2.66 eV | -5.90 eV |

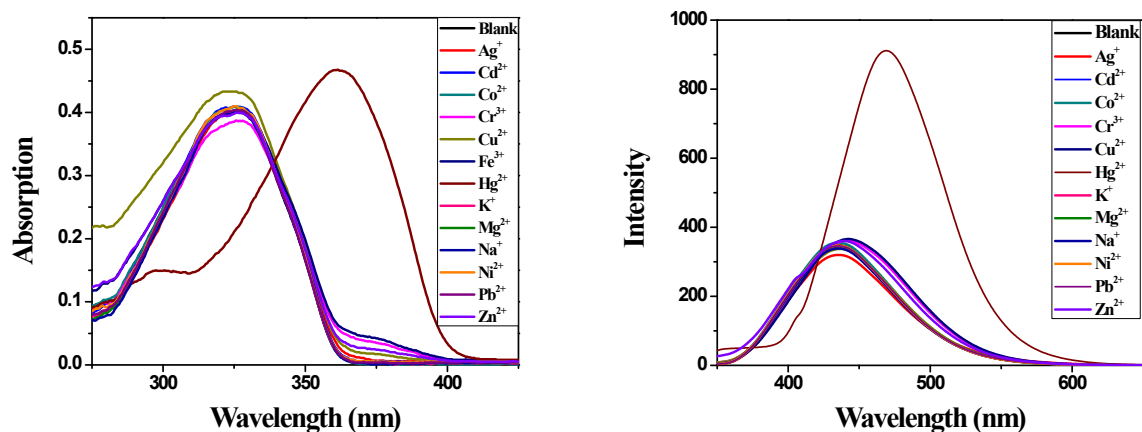

**Figure S2.** UV-vis spectra and emission spectra of **TBT** ( $c = 2.0 \times 10^{-5}$  M) in the presence of metal ions in dichloromethane.  $\text{Ag}^+$ ,  $\text{Cd}^{2+}$ ,  $\text{Co}^{2+}$ ,  $\text{Cr}^{3+}$ ,  $\text{Cu}^{2+}$ ,  $\text{Fe}^{3+}$ ,  $\text{Hg}^{2+}$ ,  $\text{K}^+$ ,  $\text{Mg}^{2+}$ ,  $\text{Na}^+$ ,  $\text{Ni}^{2+}$ ,  $\text{Pb}^{2+}$  and  $\text{Zn}^{2+}$  (2.0 equiv) were added, respectively.

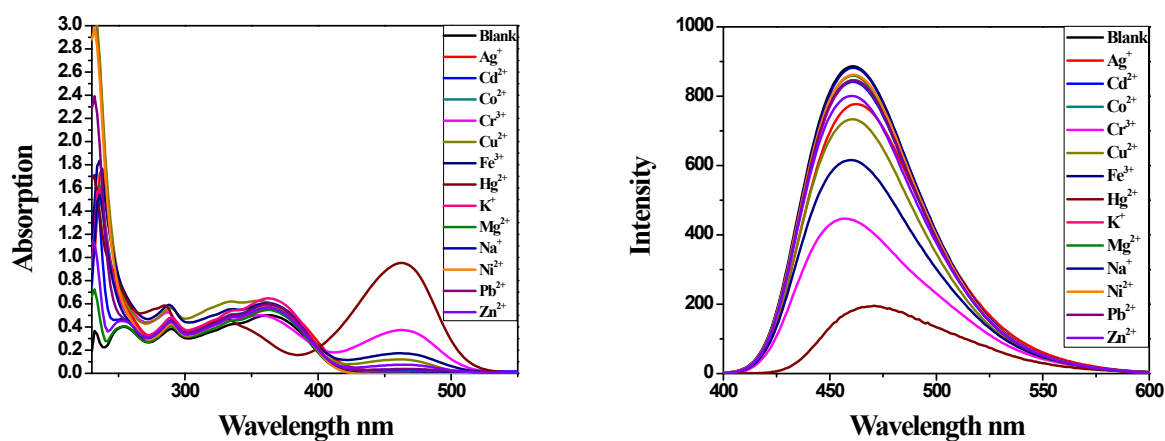

**Figure S3.** UV-vis spectra and emission spectra of **CTBT** ( $c = 2.0 \times 10^{-5}$  M) in the presence of metal ions in dichloromethane.  $\text{Ag}^+$ ,  $\text{Cd}^{2+}$ ,  $\text{Co}^{2+}$ ,  $\text{Cr}^{3+}$ ,  $\text{Cu}^{2+}$ ,  $\text{Fe}^{3+}$ ,  $\text{Hg}^{2+}$ ,  $\text{K}^+$ ,  $\text{Mg}^{2+}$ ,  $\text{Na}^+$ ,  $\text{Ni}^{2+}$ ,  $\text{Pb}^{2+}$  and  $\text{Zn}^{2+}$  (2.0 equiv) were added, respectively.

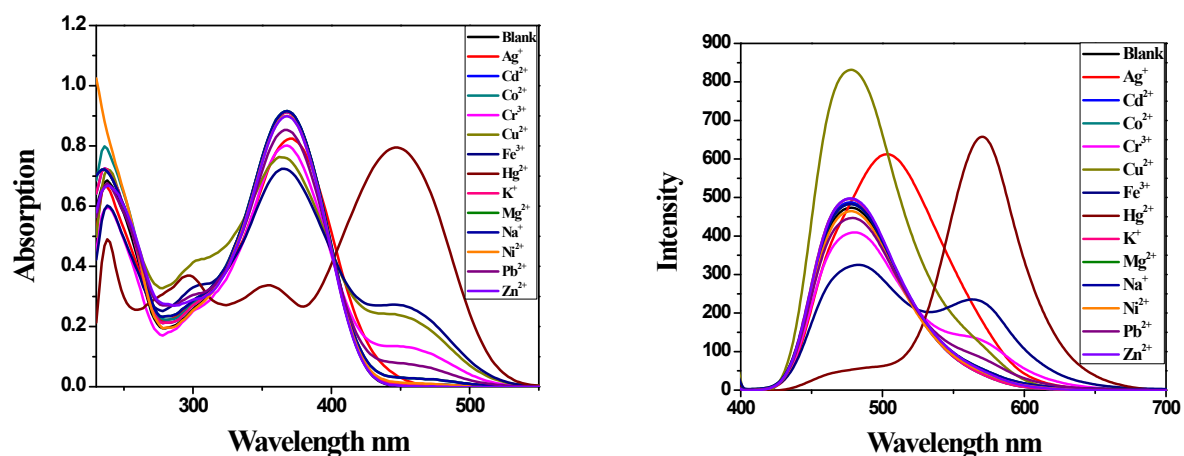

**Figure S4.** UV-vis spectra and emission spectra of **DTBT** ( $c = 2.0 \times 10^{-5}$  M) in the presence of metal ions in dichloromethane.  $\text{Ag}^+$ ,  $\text{Cd}^{2+}$ ,  $\text{Co}^{2+}$ ,  $\text{Cr}^{3+}$ ,  $\text{Cu}^{2+}$ ,  $\text{Fe}^{3+}$ ,  $\text{Hg}^{2+}$ ,  $\text{K}^+$ ,  $\text{Mg}^{2+}$ ,  $\text{Na}^+$ ,  $\text{Ni}^{2+}$ ,  $\text{Pb}^{2+}$  and  $\text{Zn}^{2+}$  (2.0 equiv) were added, respectively.



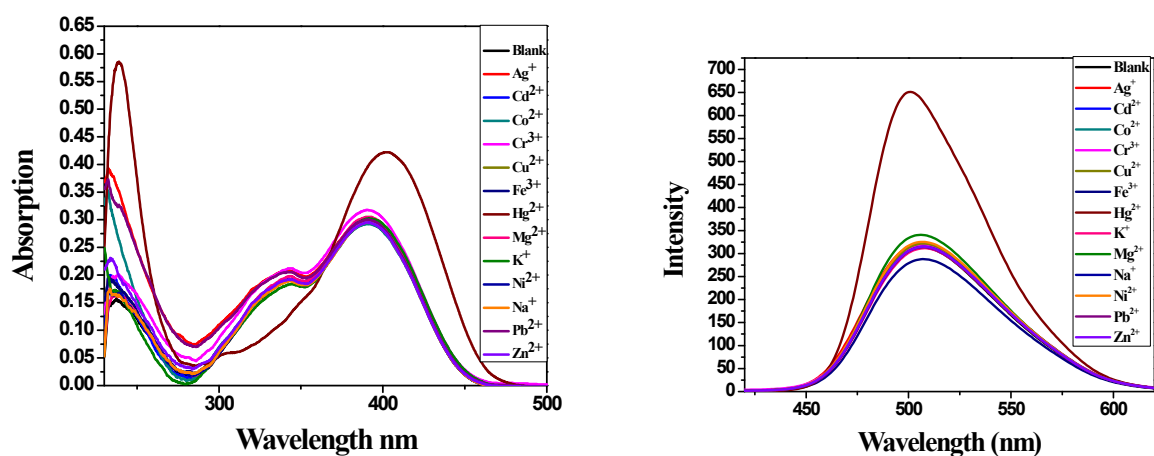

**Figure S5.** UV-vis spectra and emission spectra of NTBT ( $c = 2.0 \times 10^{-5}$  M) in the presence of metal ions in dichloromethane.  $\text{Ag}^+$ ,  $\text{Cd}^{2+}$ ,  $\text{Co}^{2+}$ ,  $\text{Cr}^{3+}$ ,  $\text{Cu}^{2+}$ ,  $\text{Fe}^{3+}$ ,  $\text{Hg}^{2+}$ ,  $\text{K}^+$ ,  $\text{Mg}^{2+}$ ,  $\text{Na}^+$ ,  $\text{Ni}^{2+}$ ,  $\text{Pb}^{2+}$  and  $\text{Zn}^{2+}$  (2.0 equiv) were added, respectively.

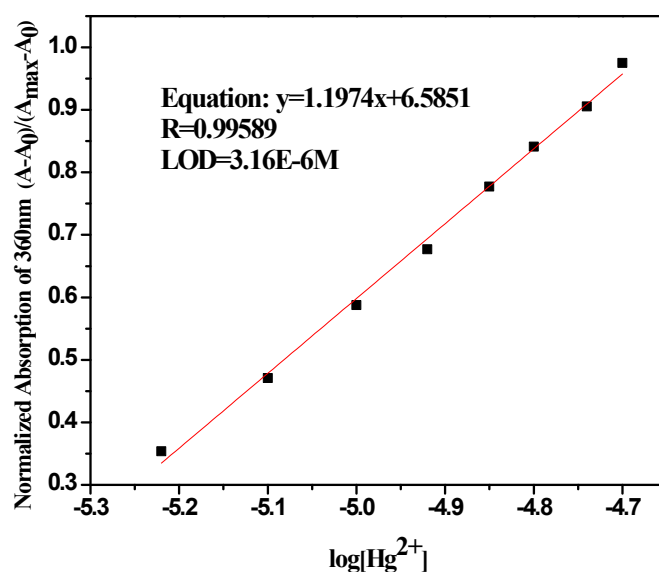

**Figure S6.** Absorption intensity of the TBT at various concentration of  $\text{Hg}^{2+}$ . (The fitted line of the eight intermediate values (6  $\mu\text{M}$  -20  $\mu\text{M}$   $\text{Hg}^{2+}$ ).

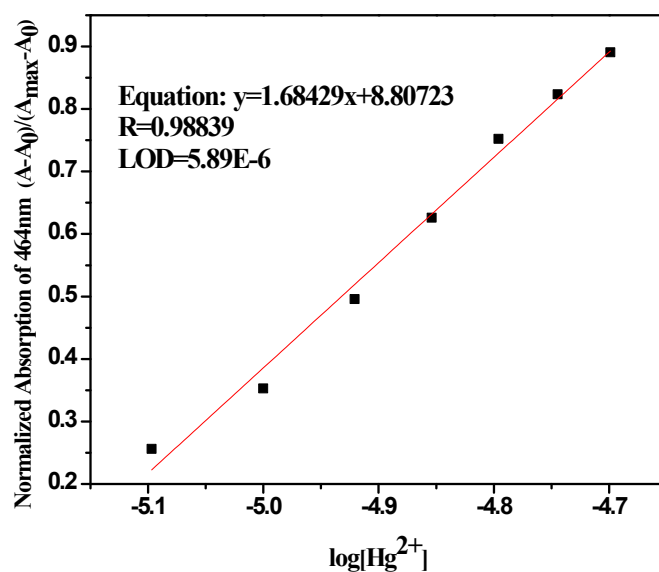

**Figure S7.** Absorption intensity of the CTBT at various concentration of  $\text{Hg}^{2+}$ . (The fitted line of the seven intermediate values (8  $\mu\text{M}$  -20  $\mu\text{M}$   $\text{Hg}^{2+}$ ).

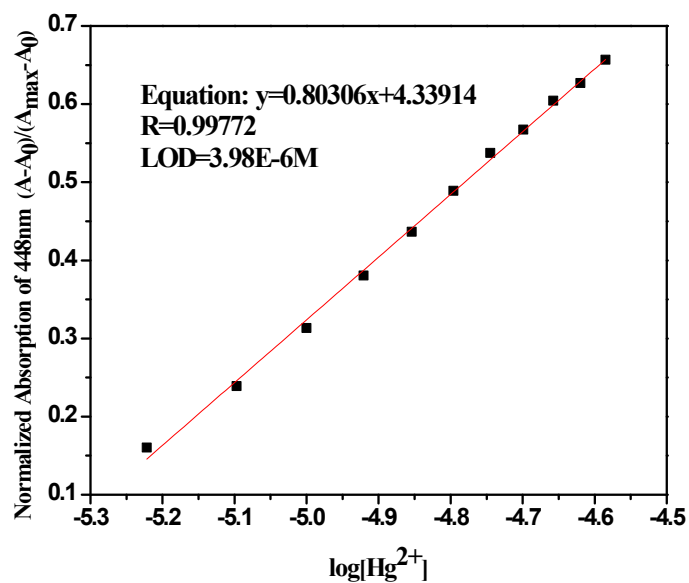

**Figure S8.** Absorption intensity of the DTBT at various concentration of  $\text{Hg}^{2+}$ . (The fitted line of the eleven intermediate values (6  $\mu\text{M}$  -26  $\mu\text{M}$   $\text{Hg}^{2+}$ ).

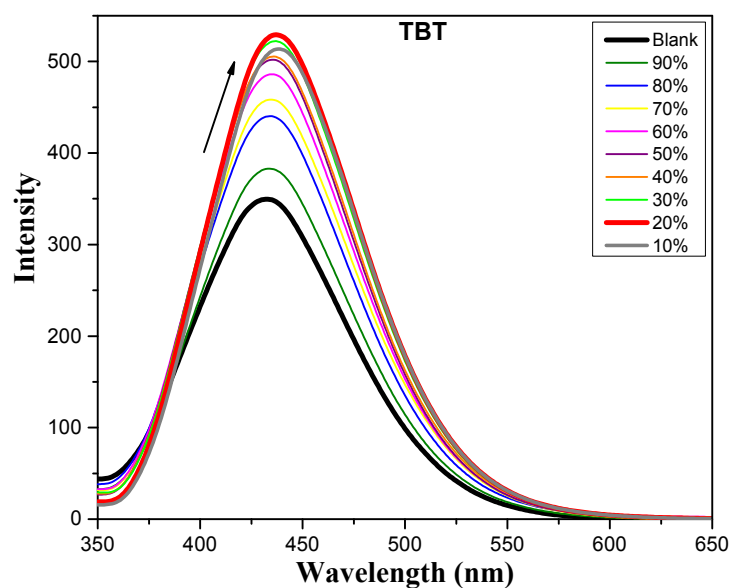

**Figure S9.** Changes in the luminescent spectra of **TBT** ( $c=2\times 10^{-5}$  M) in THF and the mixed solvent of THF and water (different volume ratio).

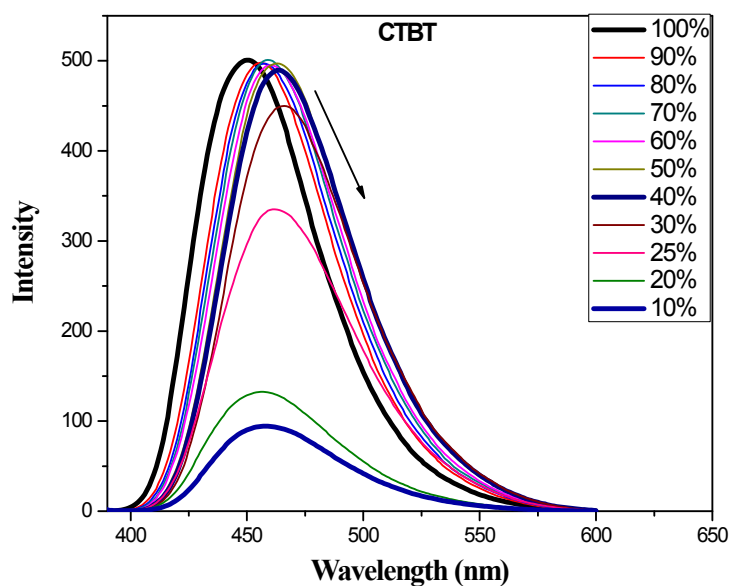

**Figure S10.** Changes in the luminescent spectra of **CTBT** ( $c=2\times 10^{-5}$  M) in THF and the mixed solvent of THF and water (different volume ratio).

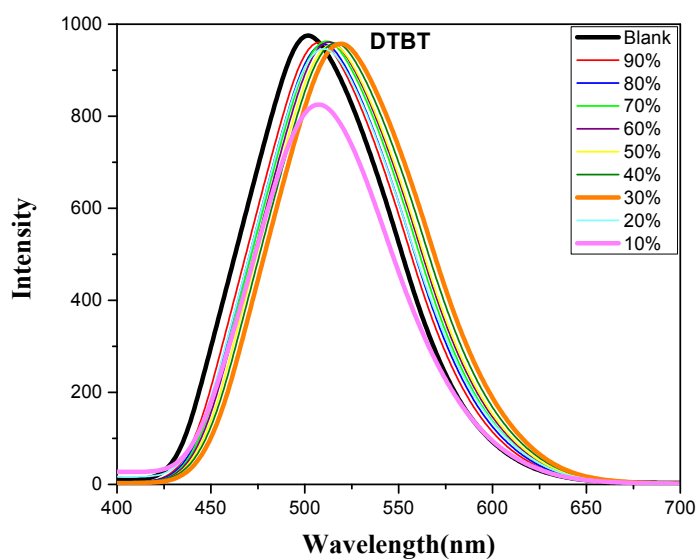

**Figure S11.** Changes in the luminescent spectra of **DTBT** ( $c=2 \times 10^{-5}$  M) in THF and the mixed solvent of THF and water (different volume ratio).

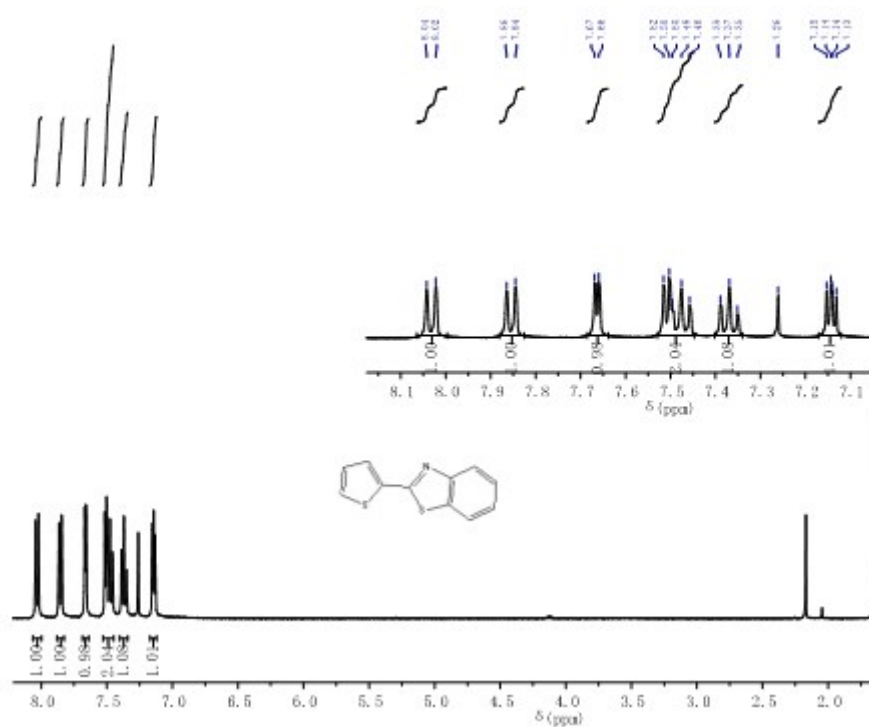

**Figure S12.**  $^1\text{H}$  NMR spectrum of **TBT**

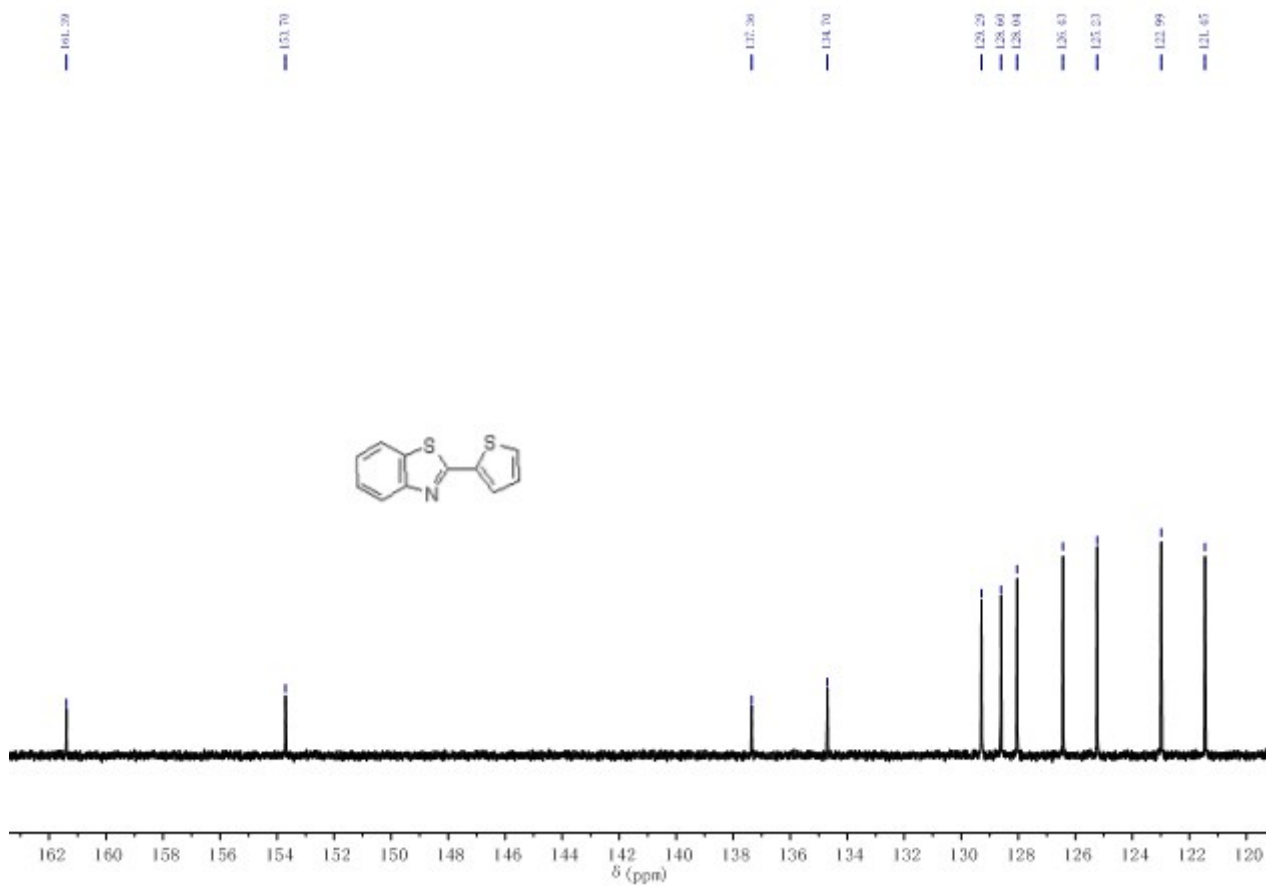

Figure S13.  $^{13}\text{C}$  NMR spectrum of TBT

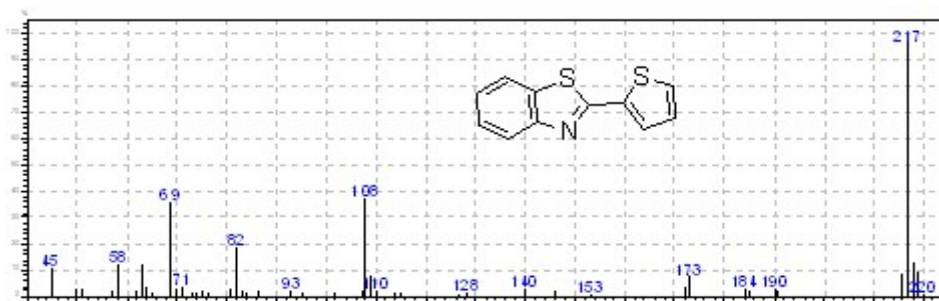

Figure S14. GC-MS of TBT

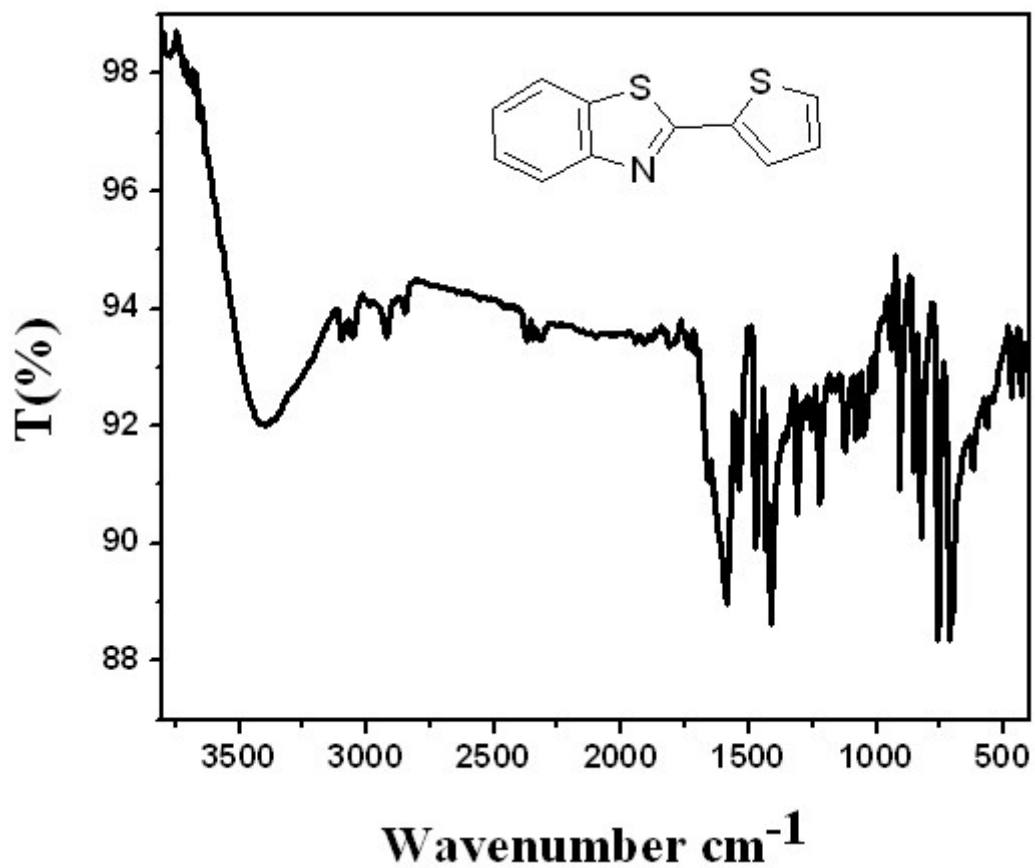

Figure S15. IR spectrum of TBT

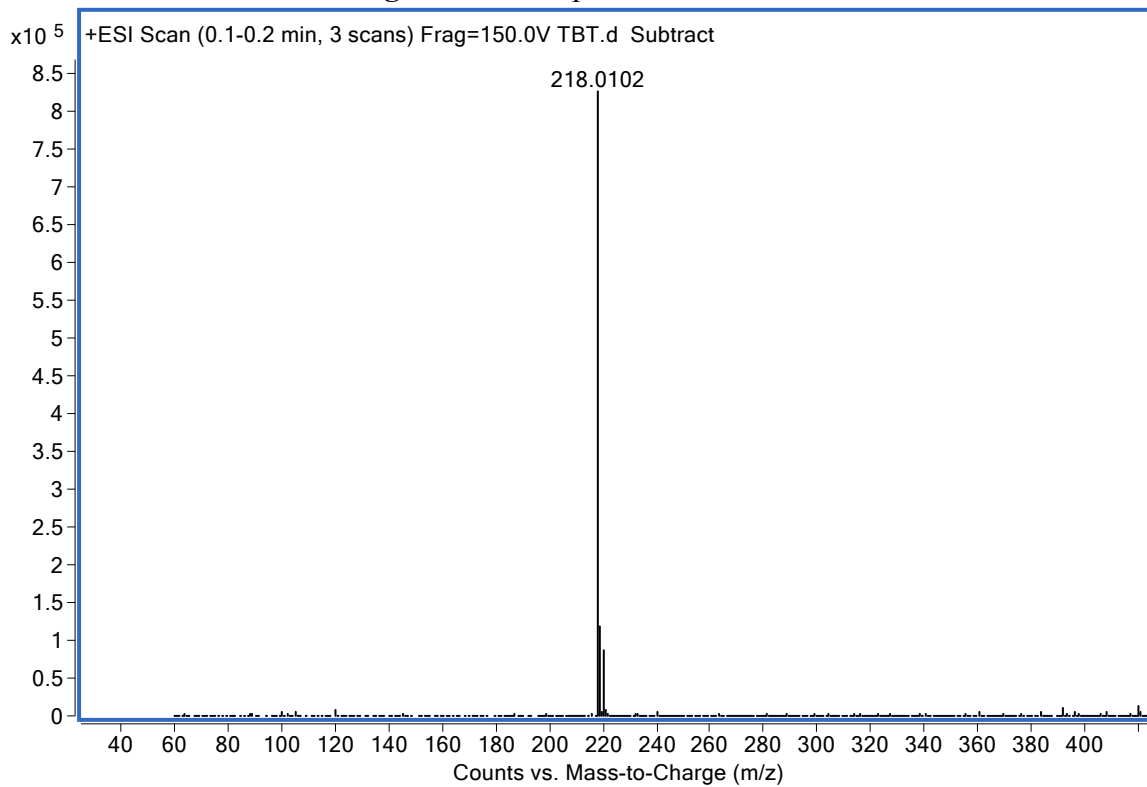

Figure S16. GC-MS of TBT

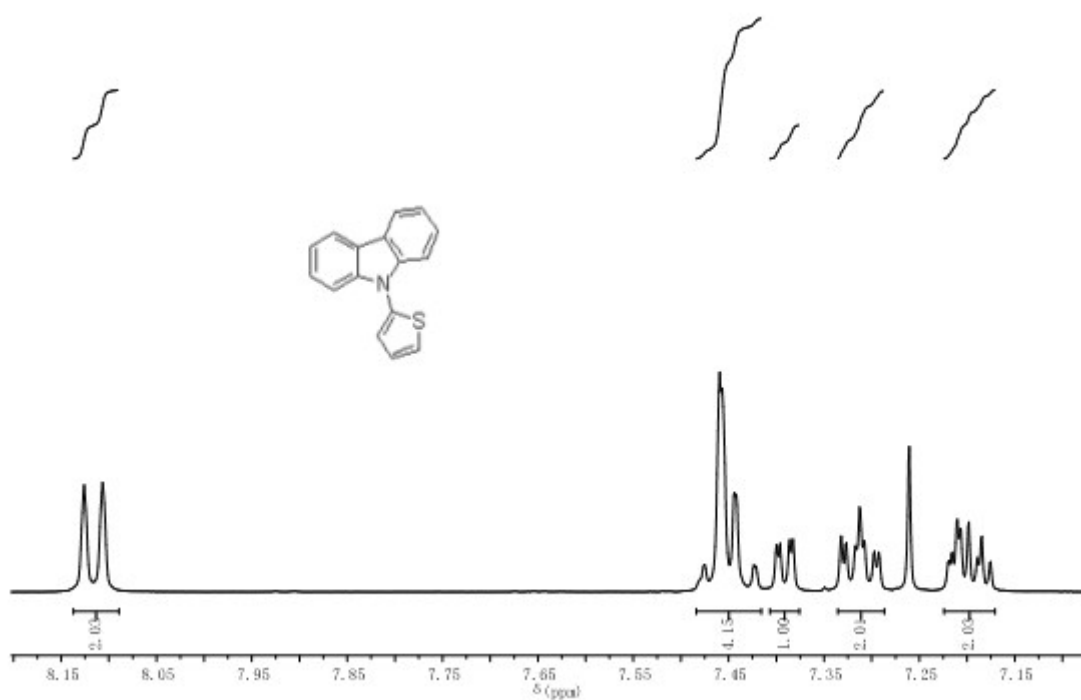

**Figure S17.**  $^1\text{H}$  NMR spectrum of 9-thiophen-2-yl-9H-Carbazole

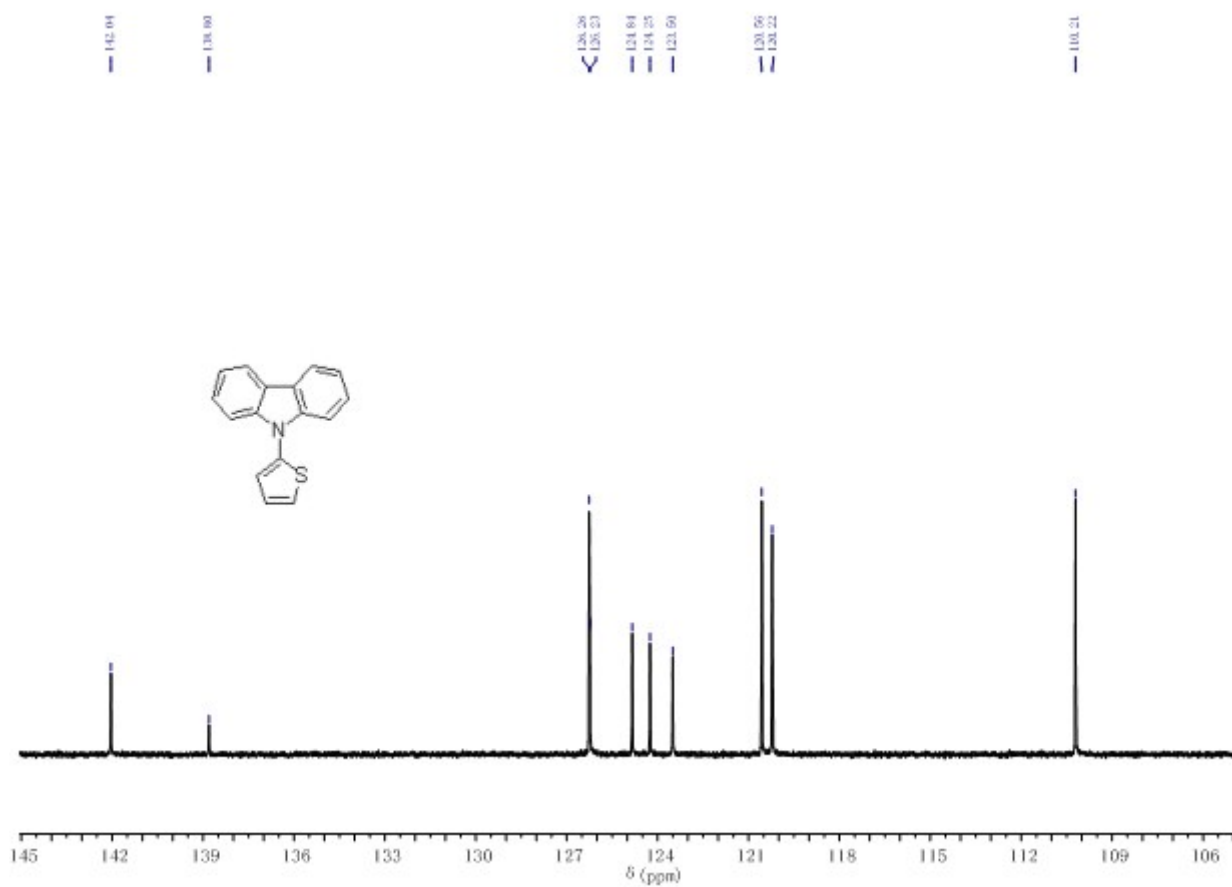

**Figure S18.**  $^{13}\text{C}$  NMR spectrum of 9-thiophen-2-yl-9H-Carbazole

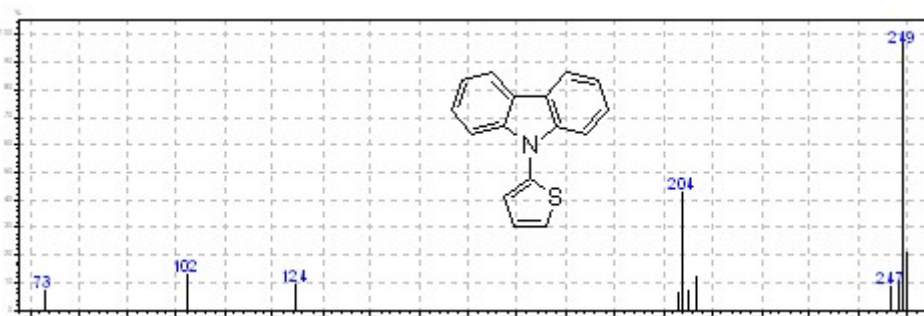

Figure S19. GC-MS of 9-thiophen-2-yl-9H-Carbazole

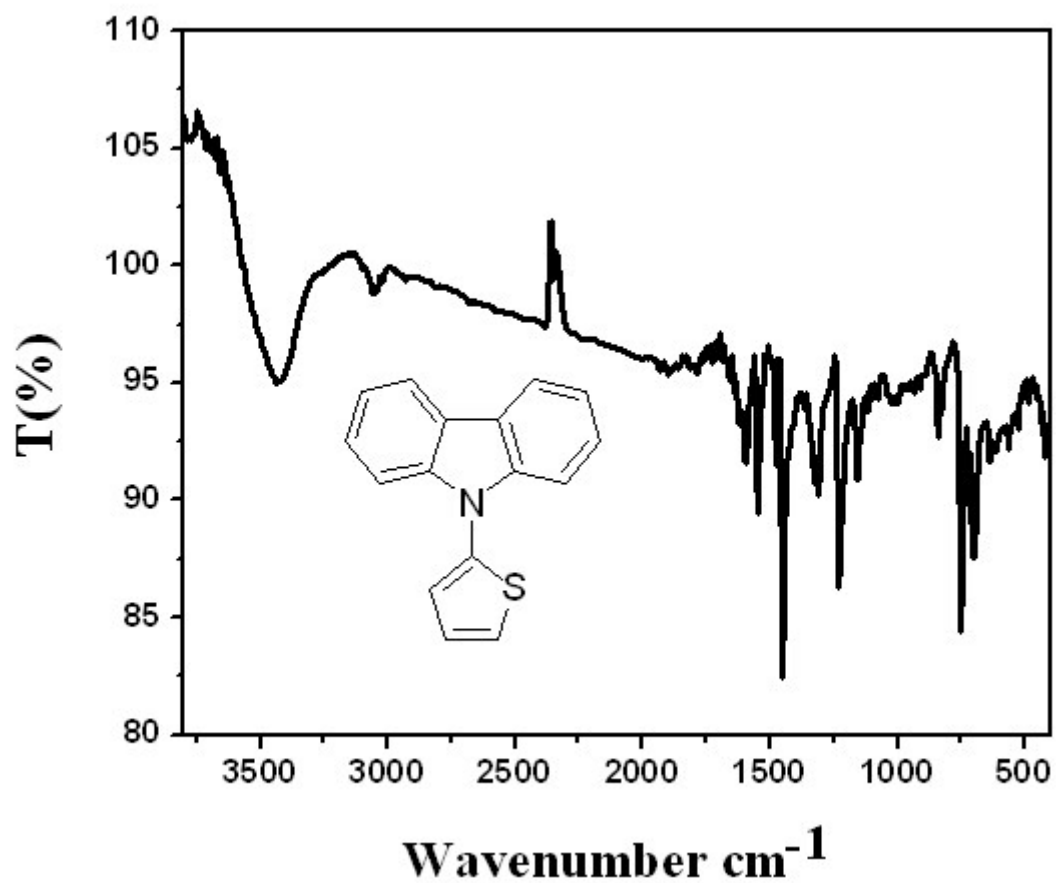

Figure S20. IR spectrum of 9-thiophen-2-yl-9H-Carbazole



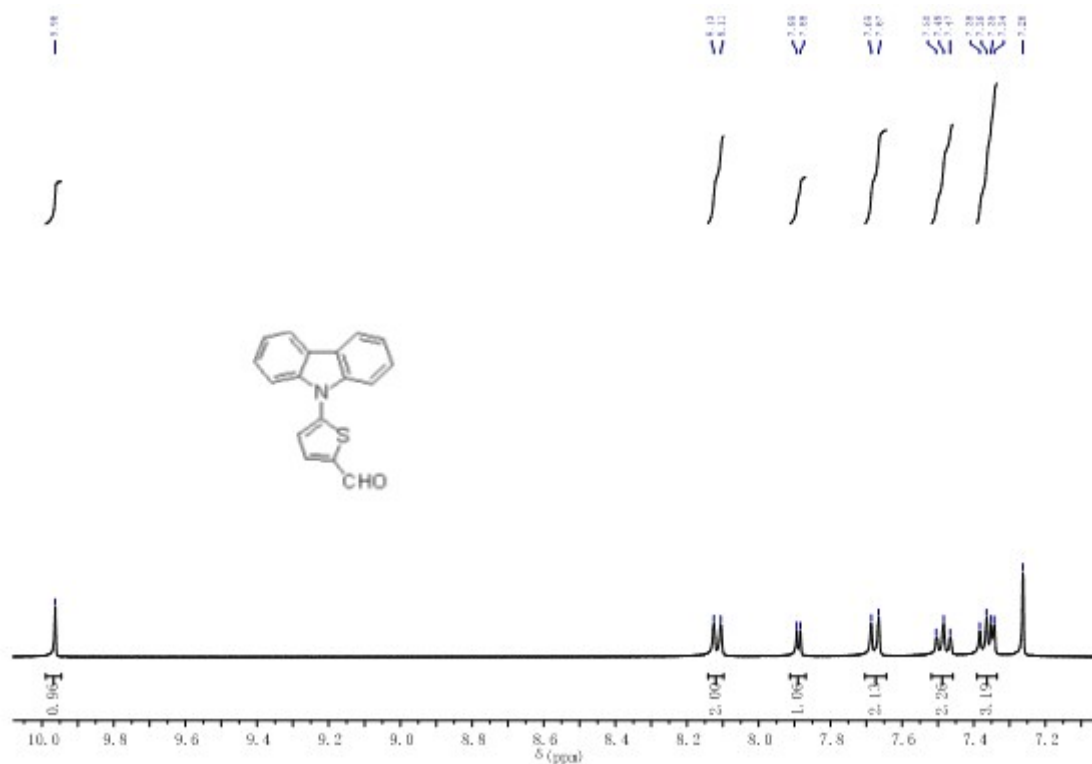

**Figure S21.** <sup>1</sup>H NMR spectrum of 5-Carbazol-9-yl-thiophene-carbaldehyde

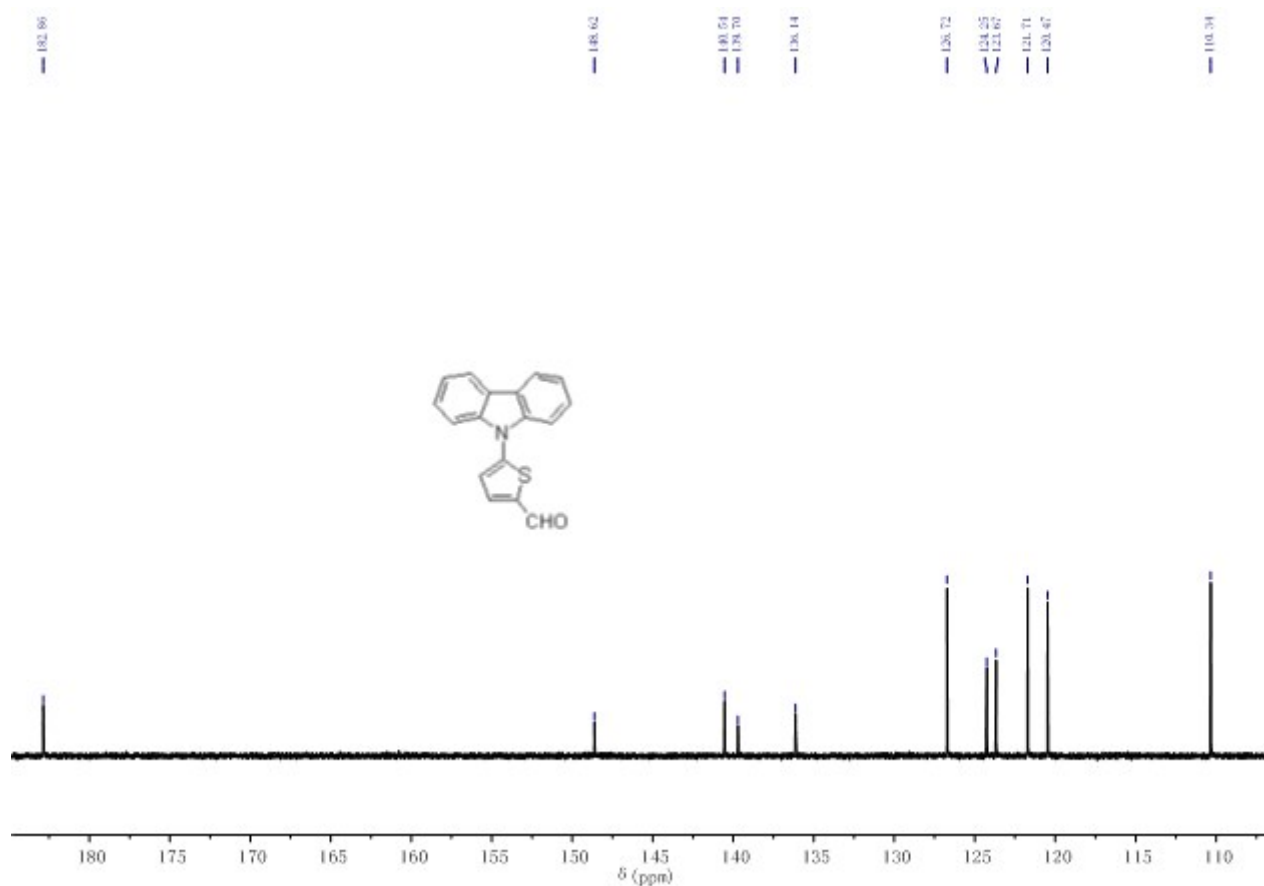

**Figure S22.** <sup>13</sup>C NMR spectrum of 5-Carbazol-9-yl-thiophene-carbaldehyde

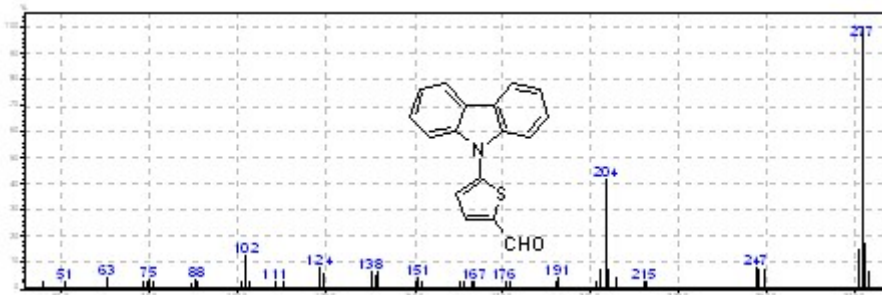

Figure S23. GC-MS of 5-Carbazol-9-yl-thiophene-carbaldehyde

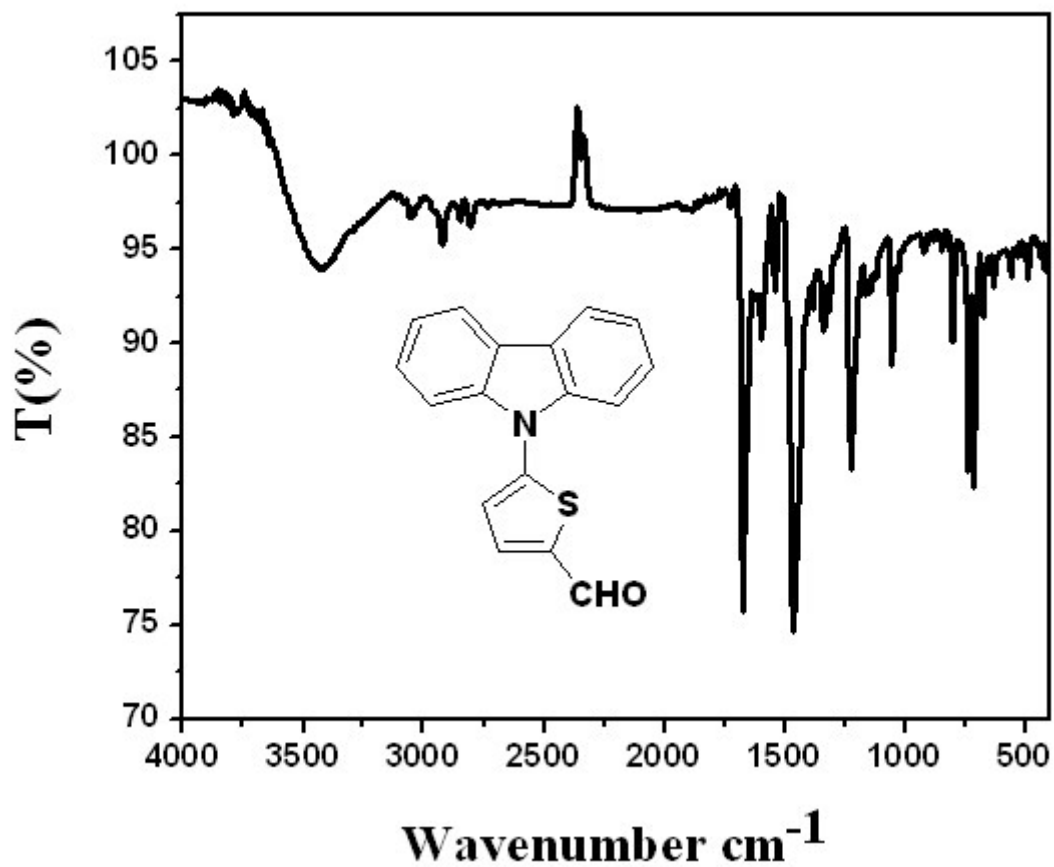

Figure S24. IR spectrum of 5-Carbazol-9-yl-thiophene-carbaldehyde

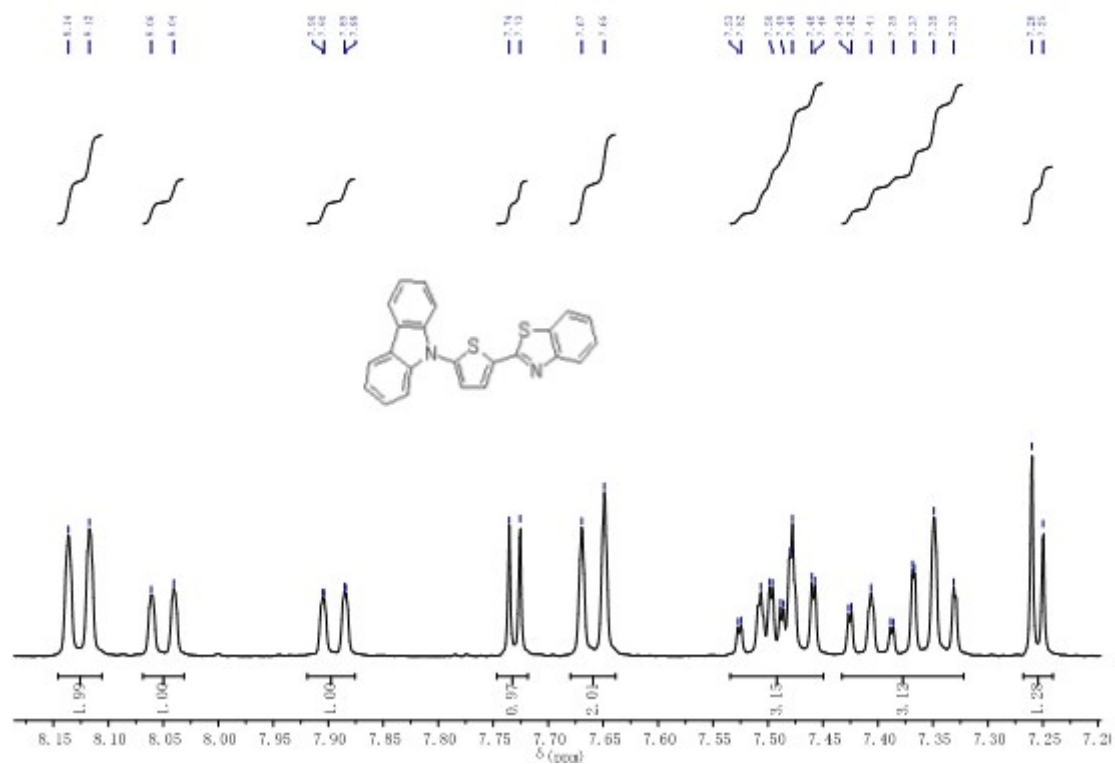

Figure S25.  $^1\text{H}$  NMR spectrum of CTBT

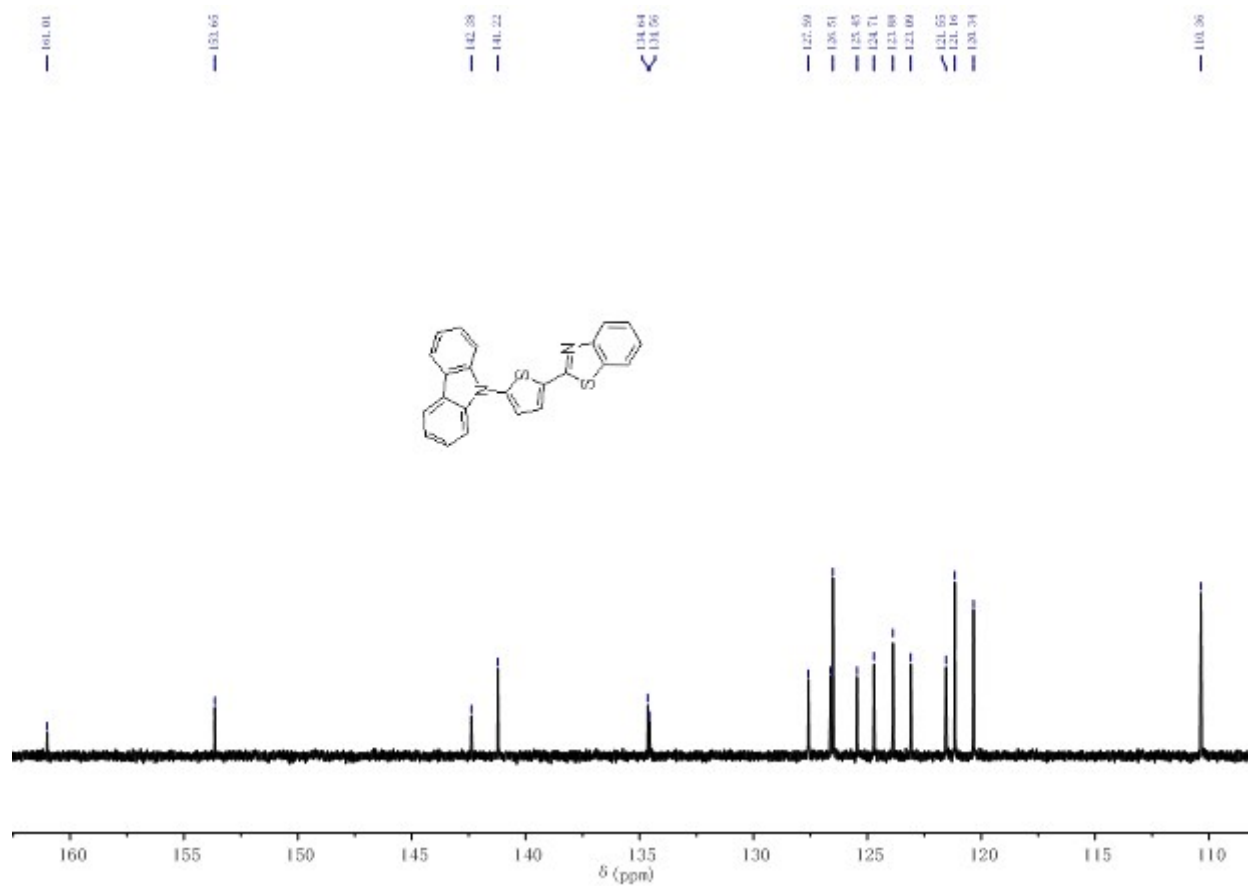

Figure S26.  $^{13}\text{C}$  NMR spectrum of CTBT

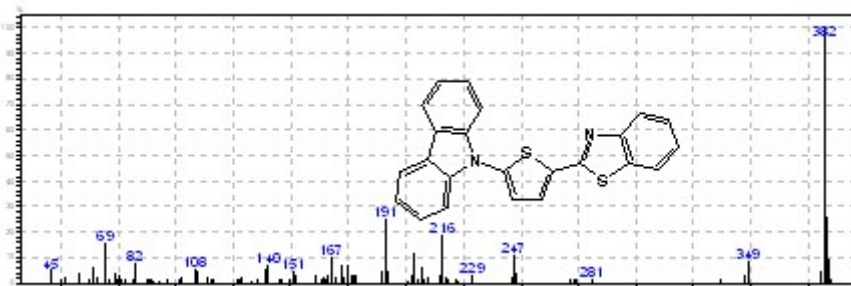

Figure S27. GC-MS of CTBT

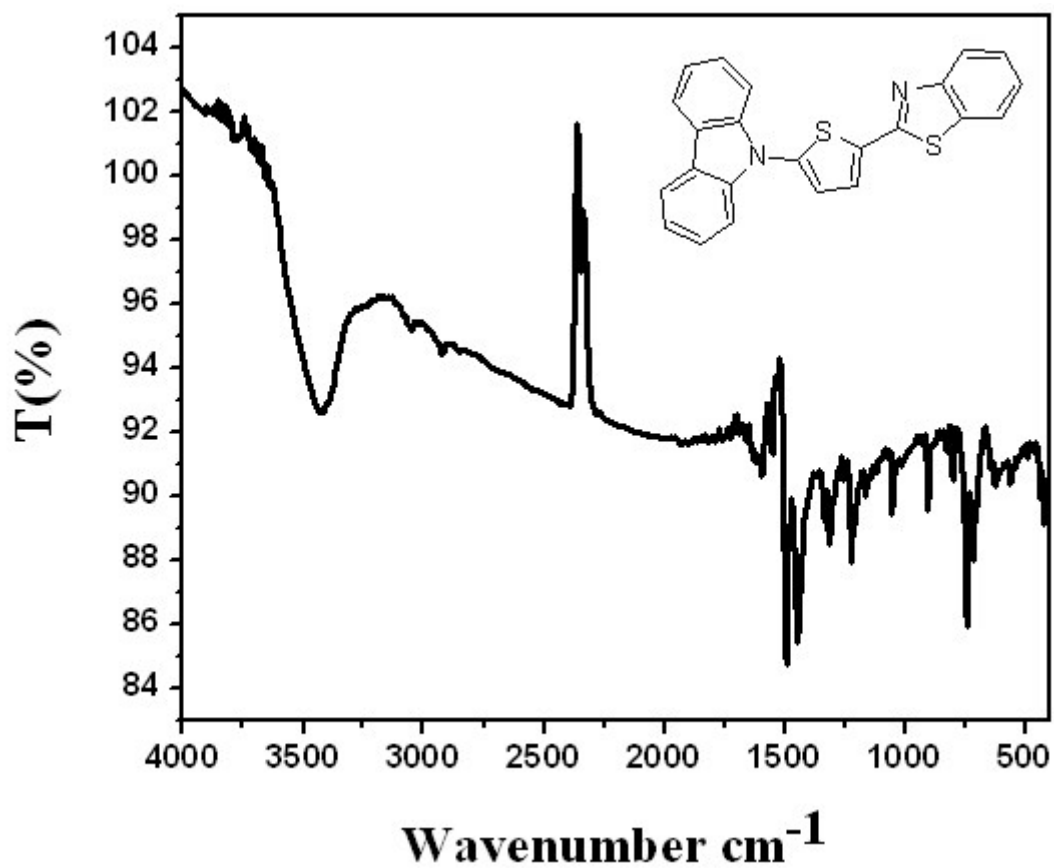

Figure S28. IR spectrum of CTBT

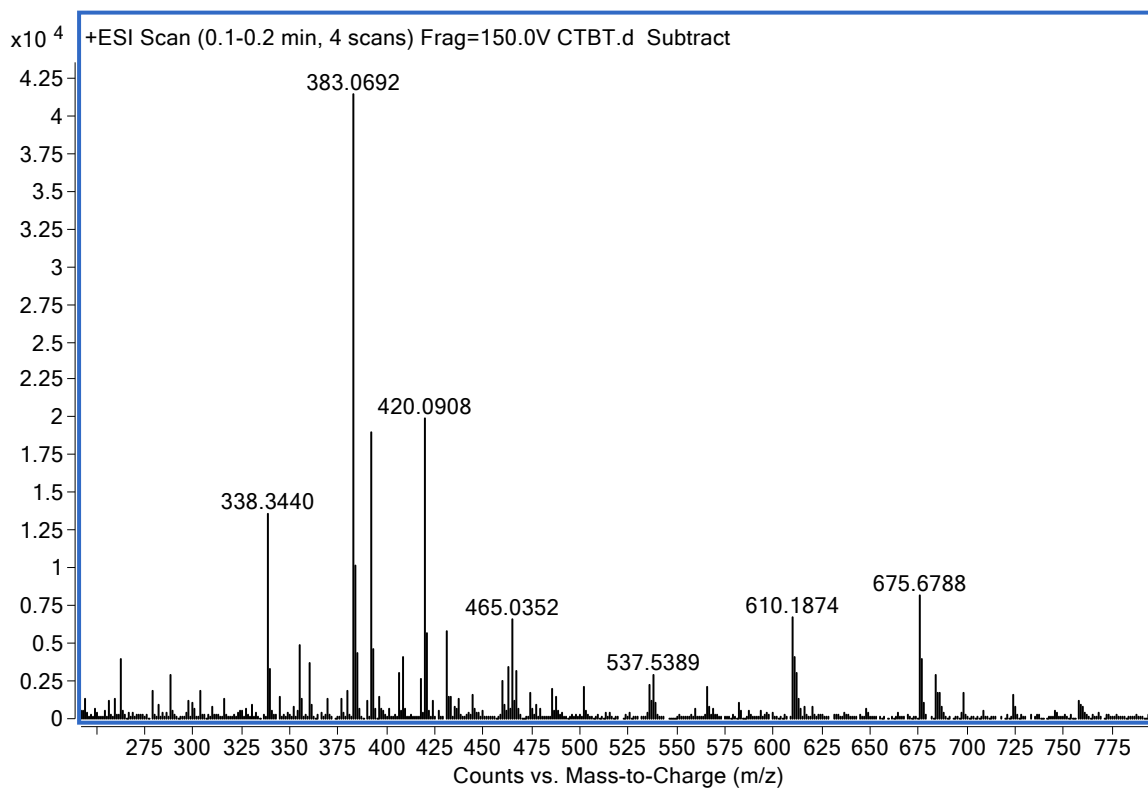

**Figure S29.** GC-MS of CTBT

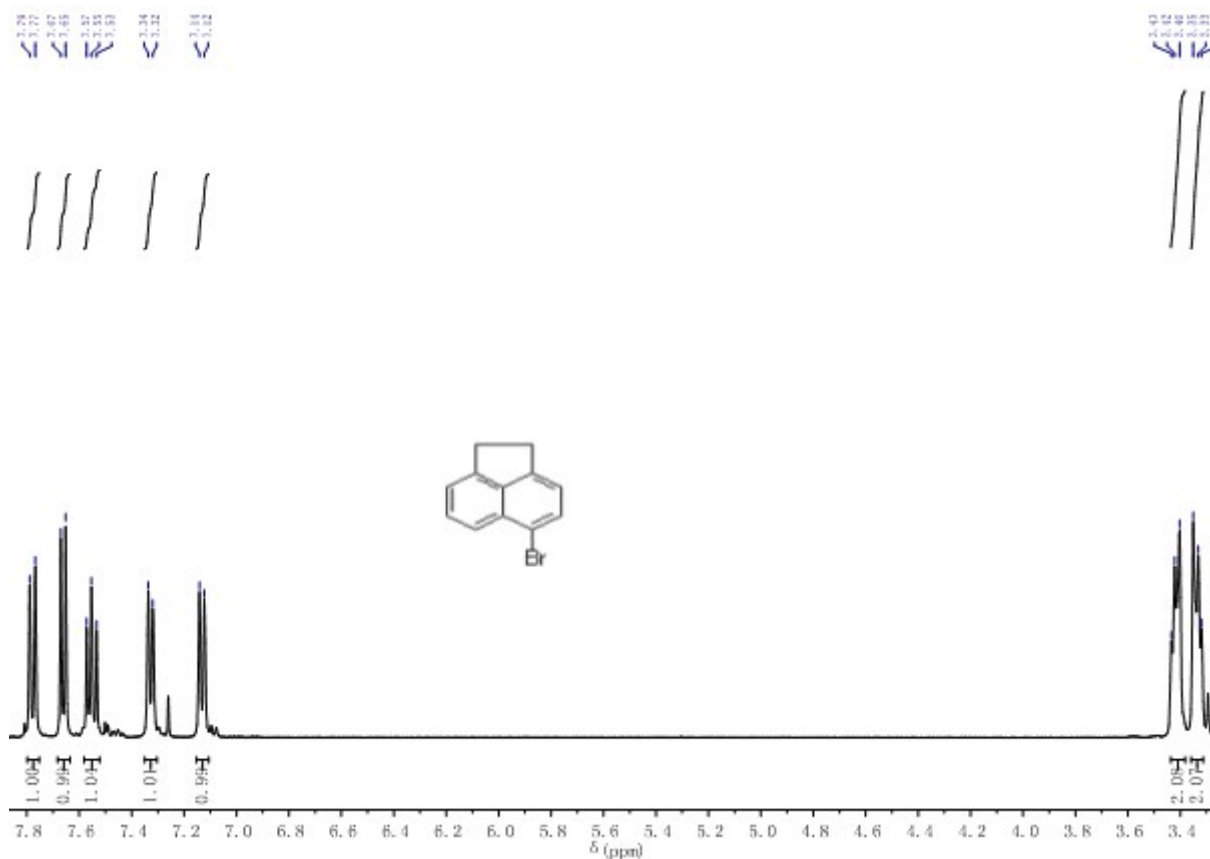

**Figure S30.** <sup>1</sup>H NMR spectrum of 5-bromo-acenaphthene

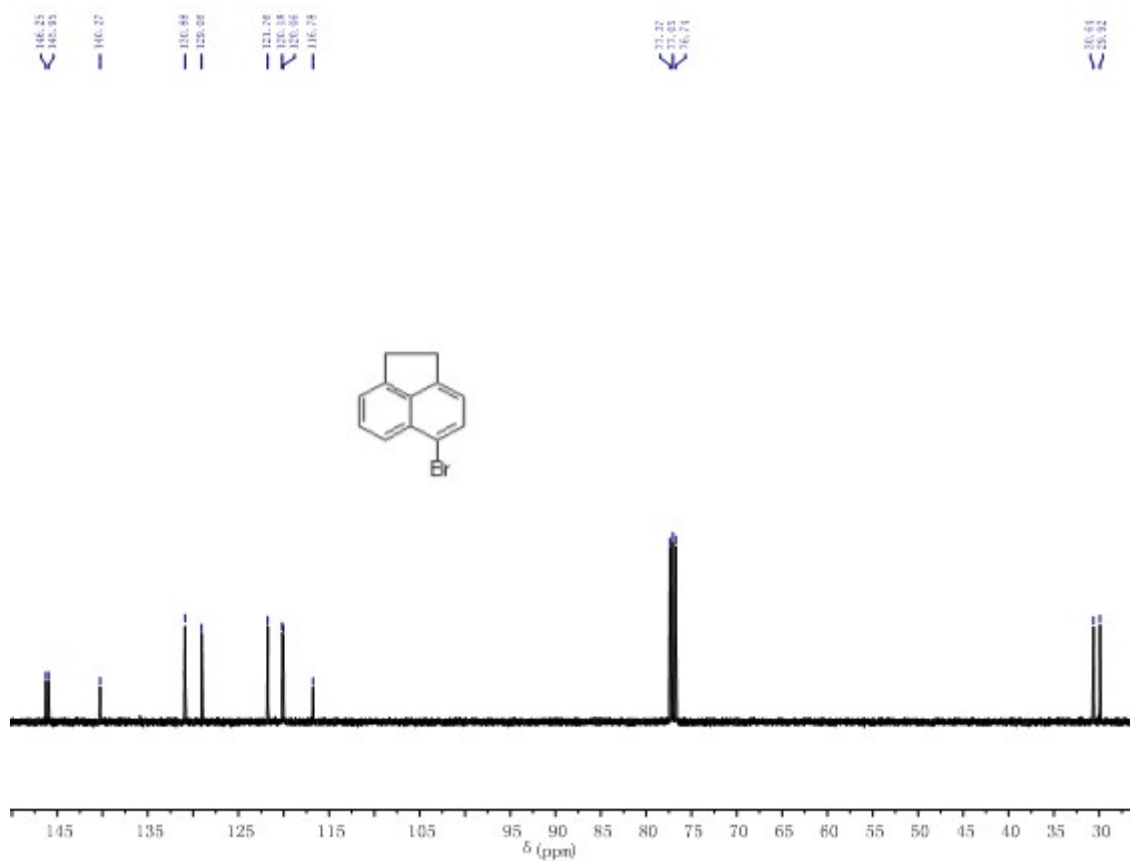

Figure S31.  $^{13}\text{C}$  NMR spectrum of 5-bromo-acenaphthene

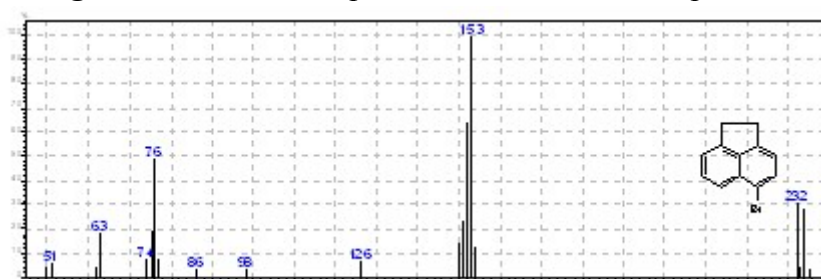

Figure S32. GC-MS of 5-bromo-acenaphthene

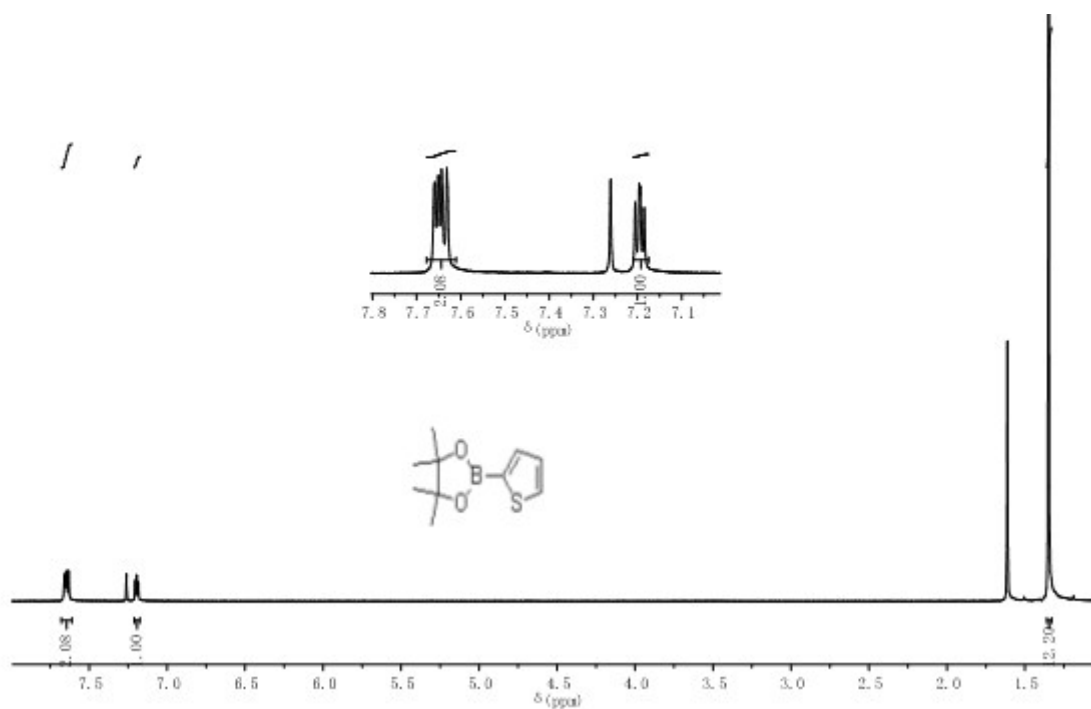

**Figure S33.**  $^1\text{H NMR}$  spectrum of 4, 4, 5, 5-tetramethyl-2-thiophen-2-yl-[1, 3, 2]dioxaborolane

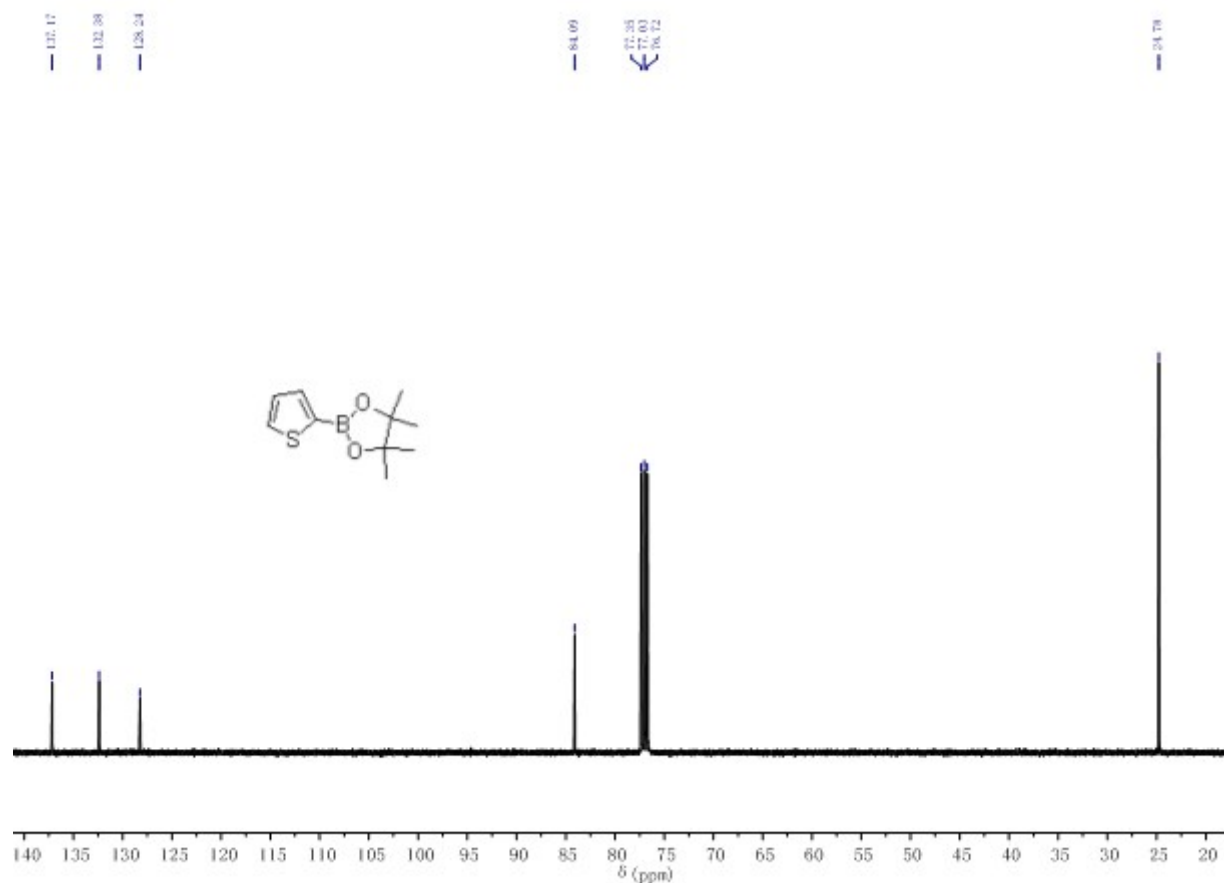

**Figure S34.**  $^{13}\text{C NMR}$  spectrum of 4, 4, 5, 5-tetramethyl-2-thiophen-2-yl-[1, 3, 2]dioxaborolane

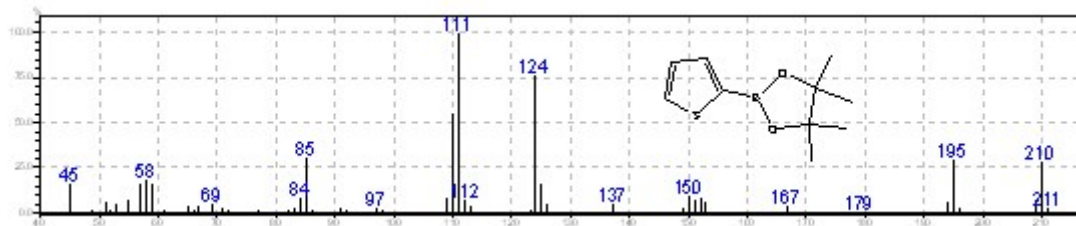

**Figure S35.** GC-MS of 4,4,5,5-tetramethyl-2-thiophen-2-yl-[1,3,2]dioxaborolane

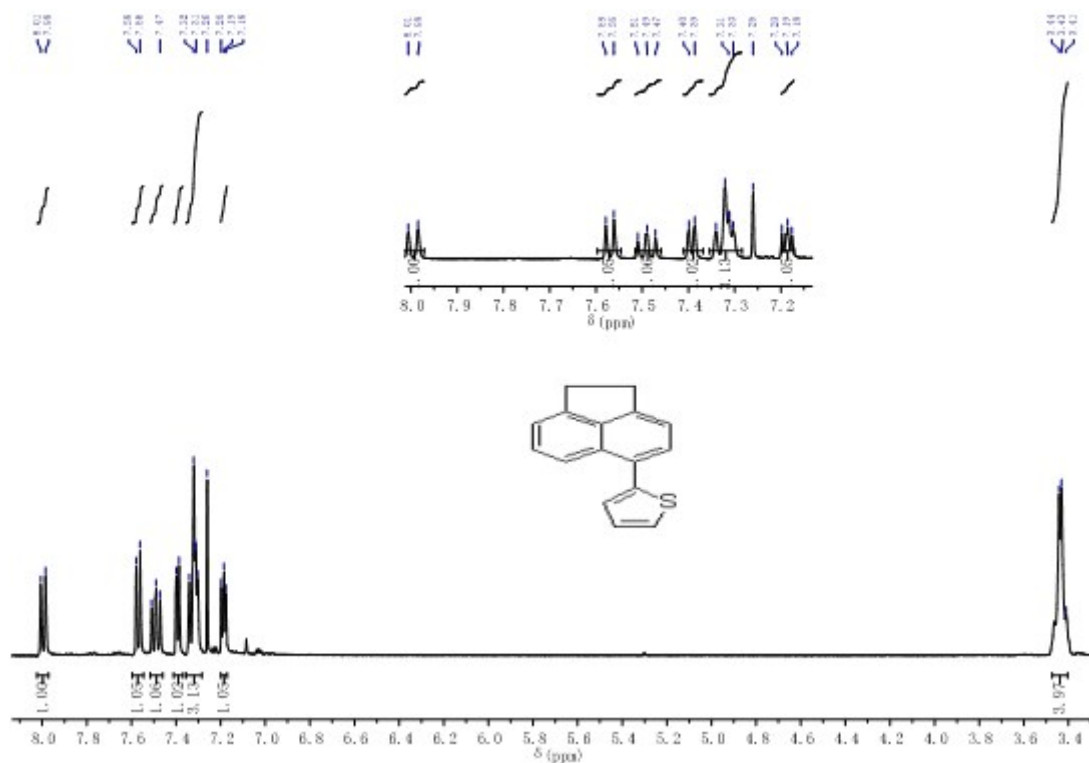

**Figure S36.**  $^1\text{H}$  NMR spectrum of 2-acenaphthen-5-yl-thiophene



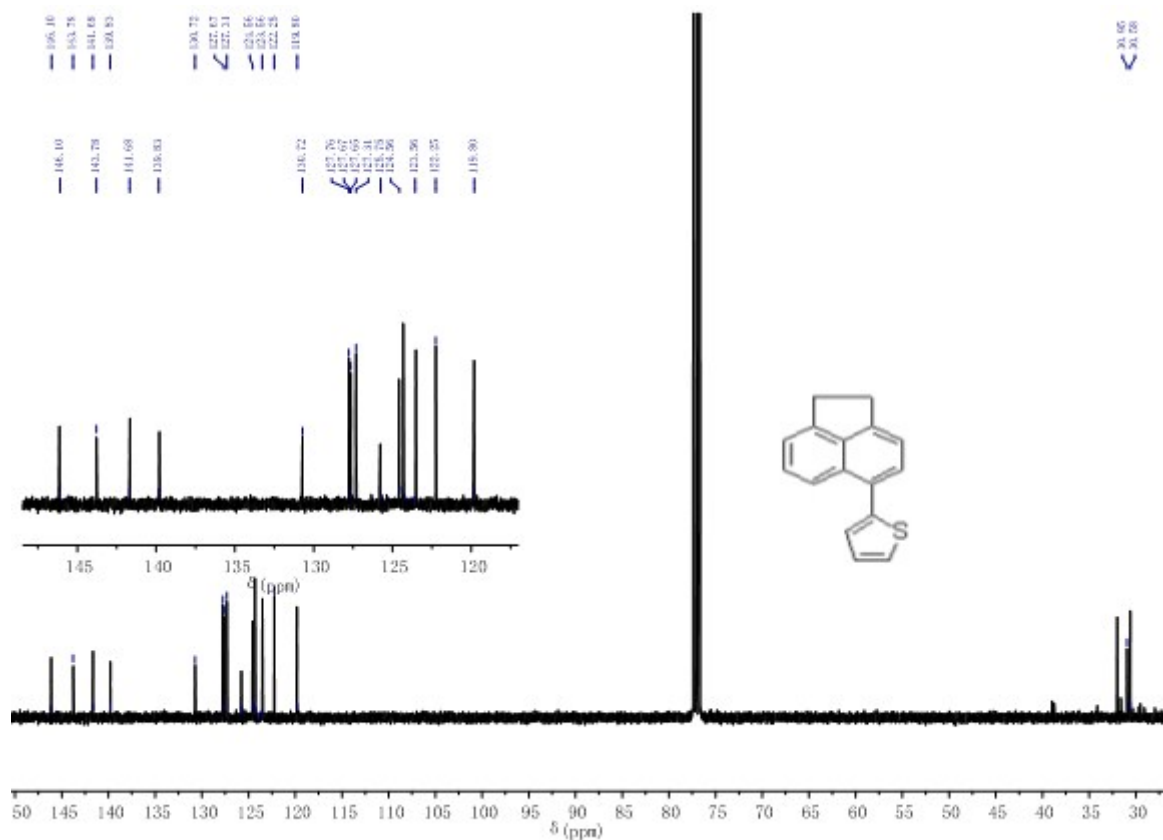

Figure S37.  $^{13}\text{C}$  NMR spectrum of 2-acenaphthen-5-yl-thiophene

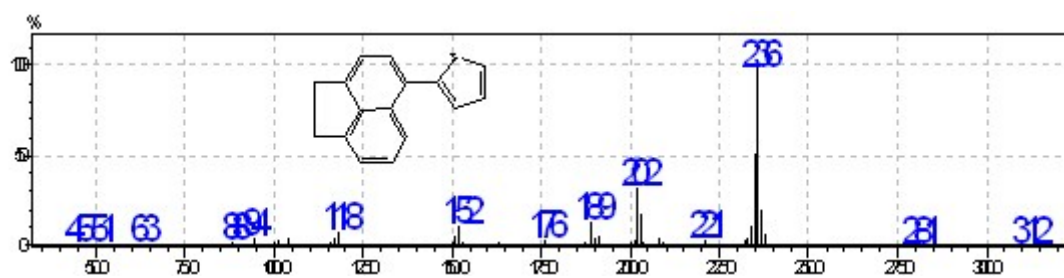

Figure S38. GC-MS of 2-acenaphthen-5-yl-thiophene

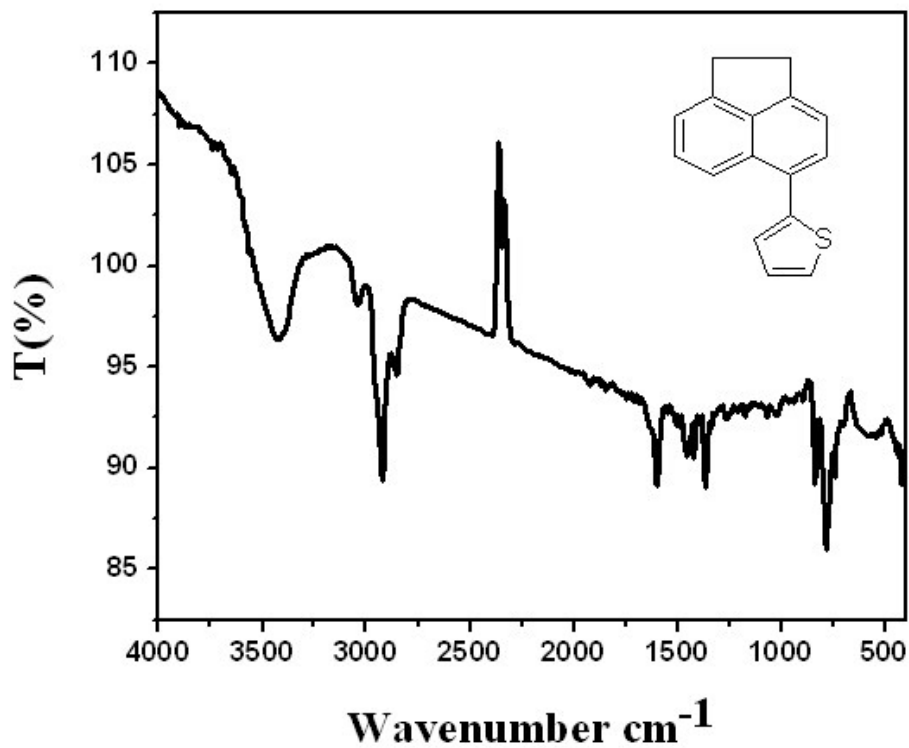

Figure S39. IR spectrum of 2-acenaphthen-5-yl-thiophene

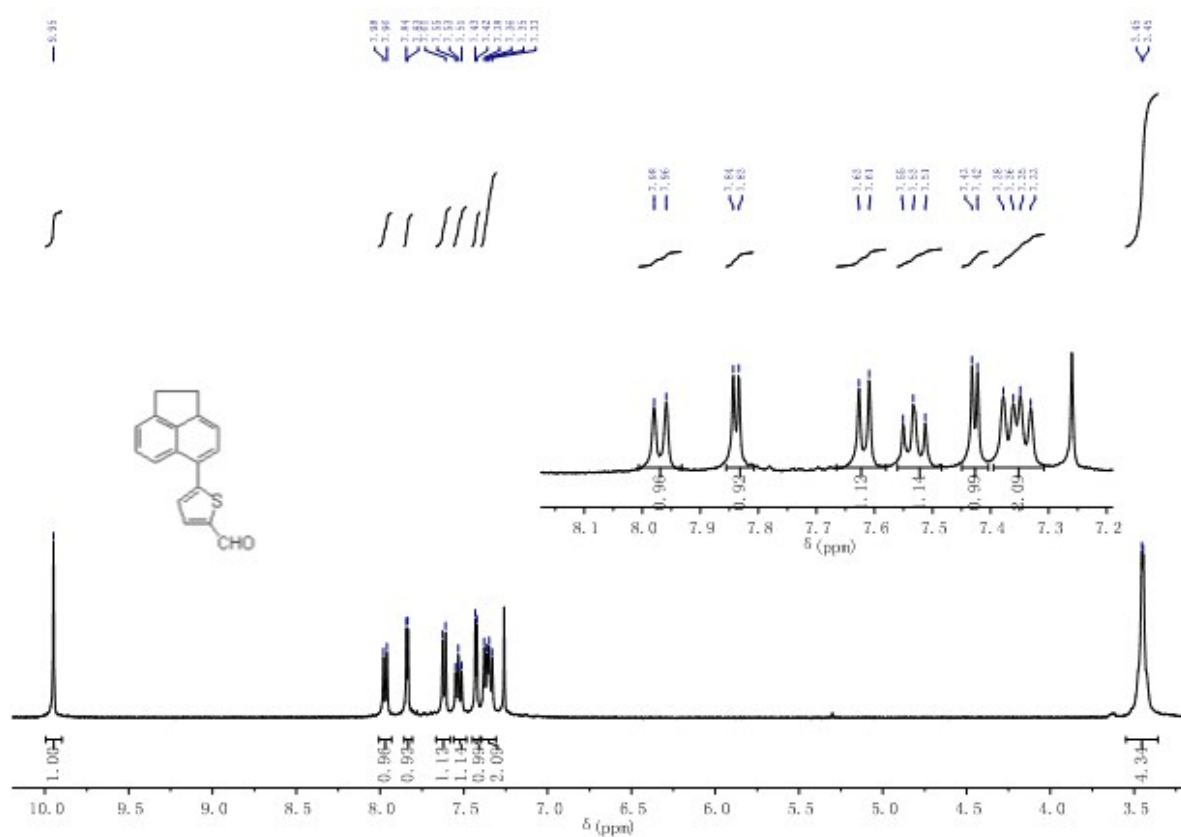

Figure S40. <sup>1</sup>H NMR spectrum of 5-acenaphthen-5-yl-thiophene-2-carbaldehyde

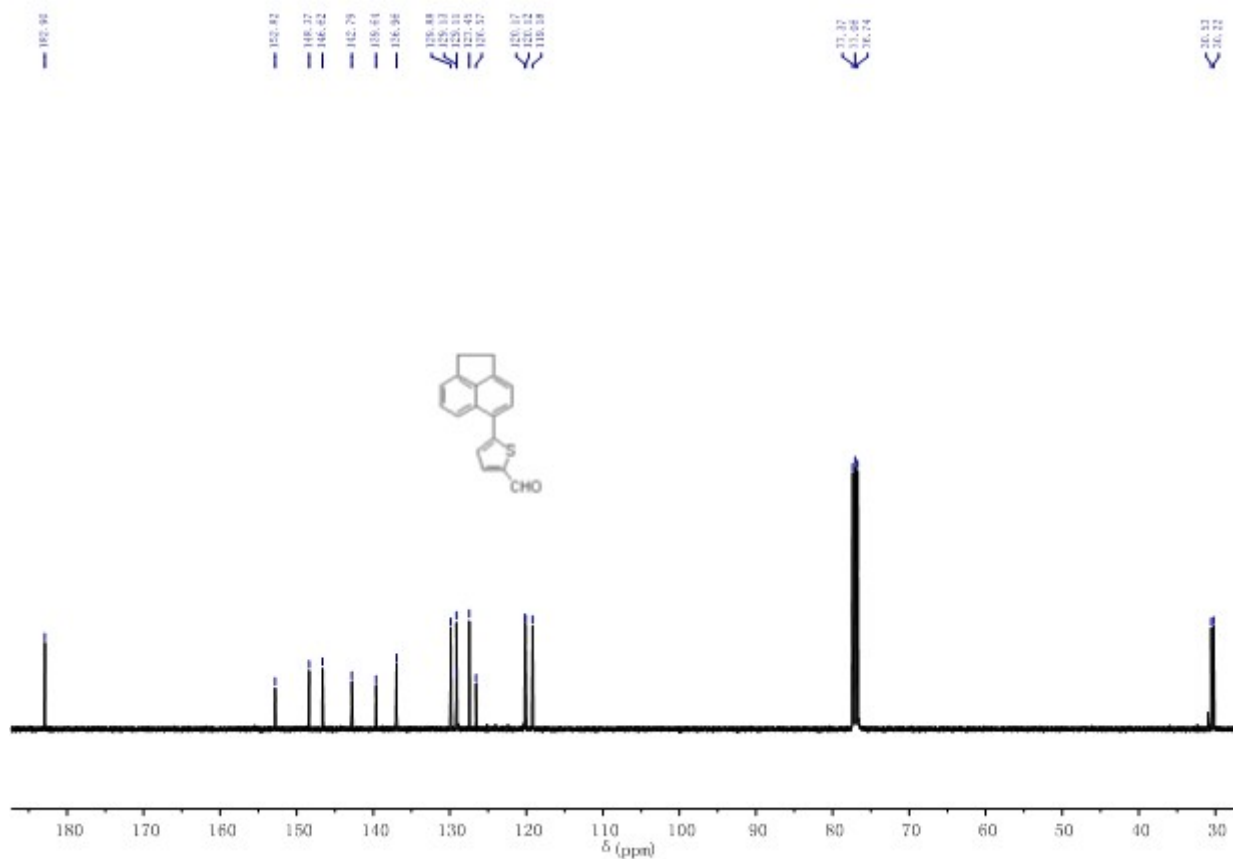

**Figure S41.**  $^{13}\text{C}$  NMR spectrum of 5-acenaphthen-5-yl-thiophene-2-carbaldehyde

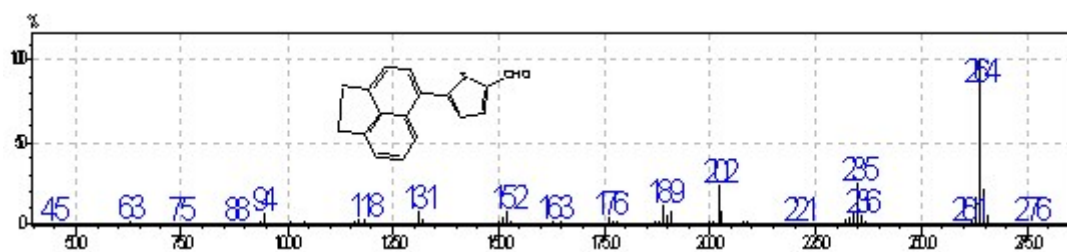

**Figure S42.** GC-MS of 5-acenaphthen-5-yl-thiophene-2-carbaldehyde

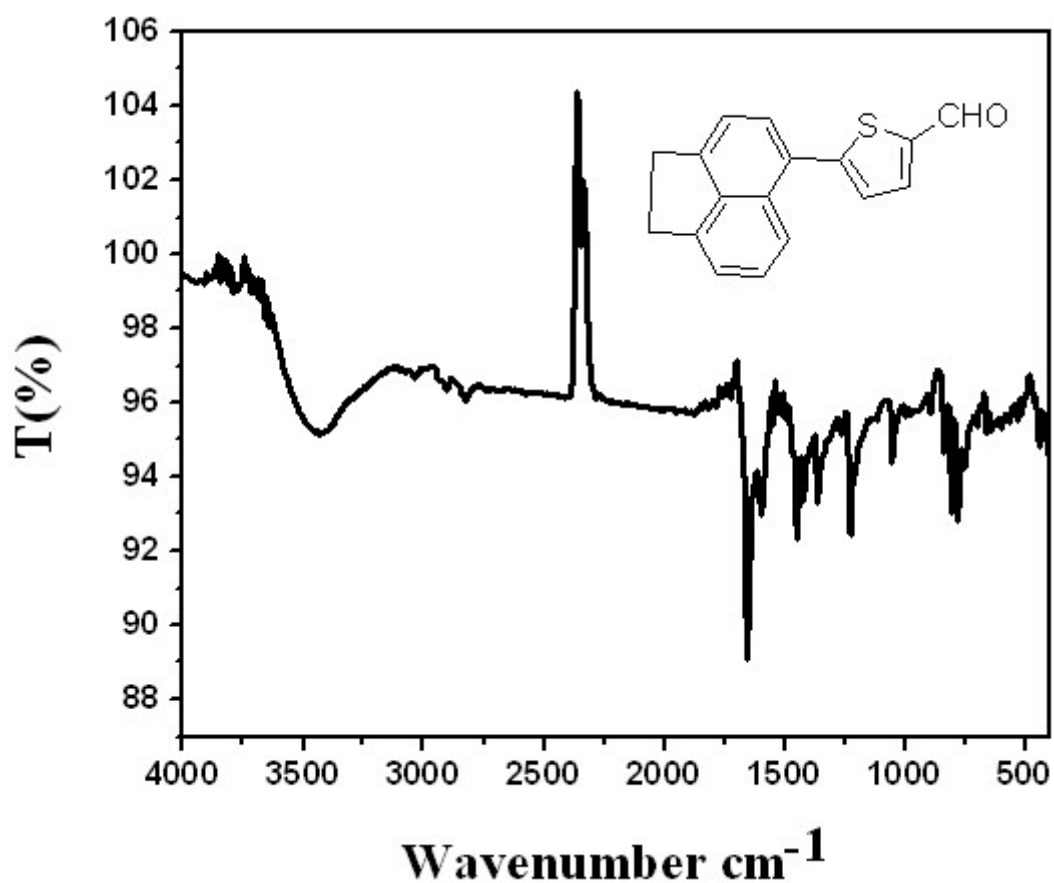

Figure S43. IR spectrum of 5-acenaphthen-5-yl-thiophene-2-carbaldehyde

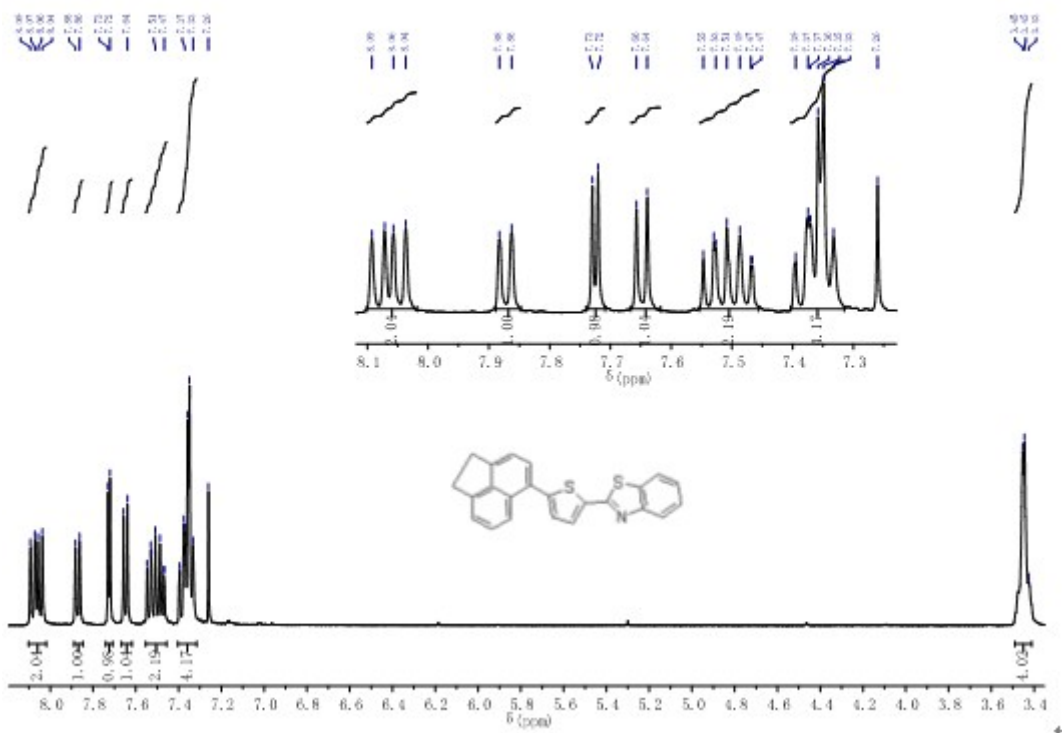

Figure S44. <sup>1</sup>H NMR spectrum of DTBT

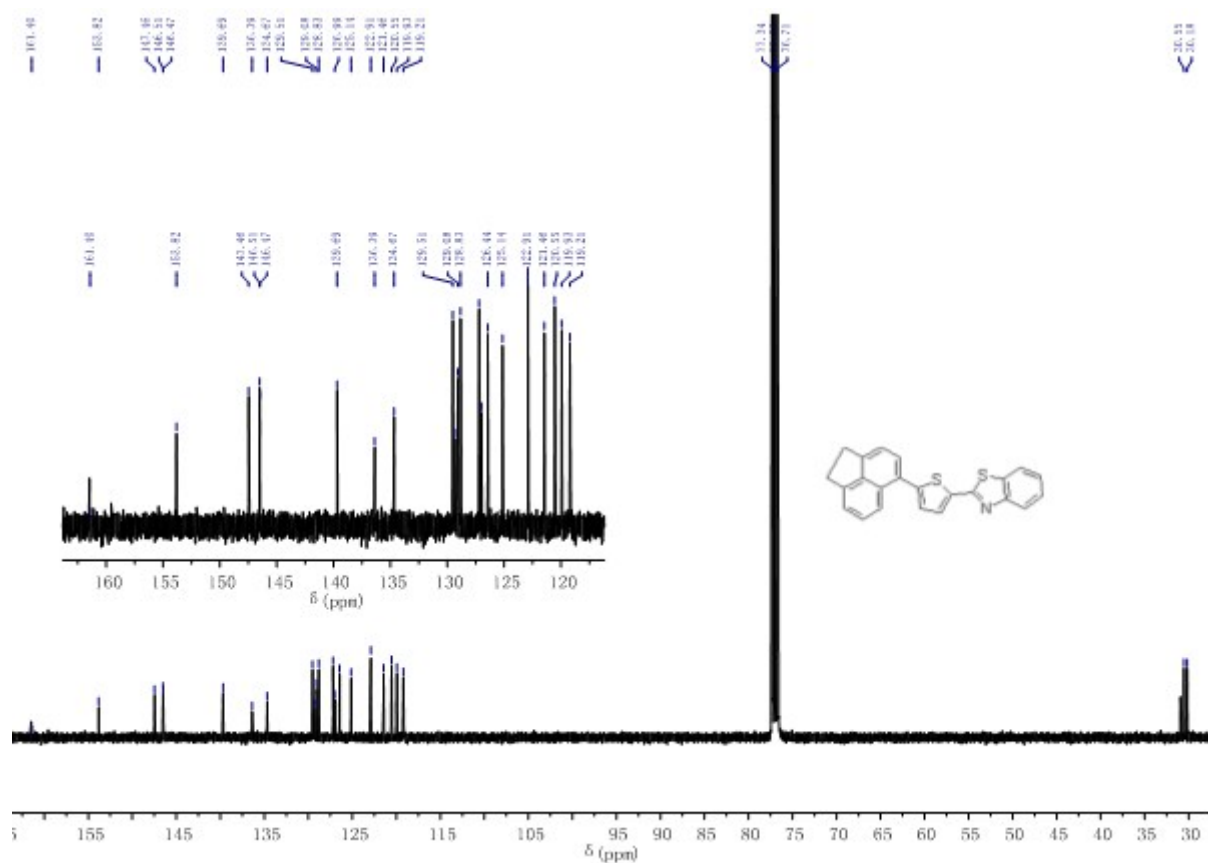

Figure S45.  $^{13}\text{C}$  NMR spectrum of DTBT

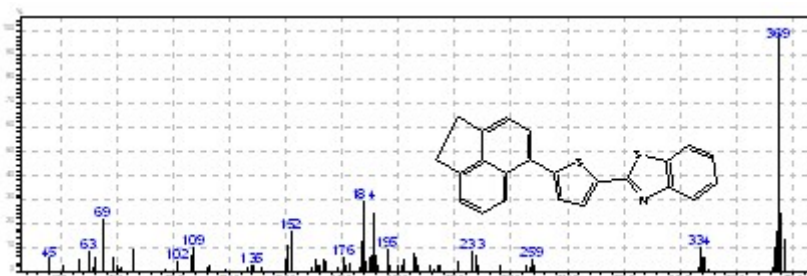

Figure S46. GC-MS of DTBT

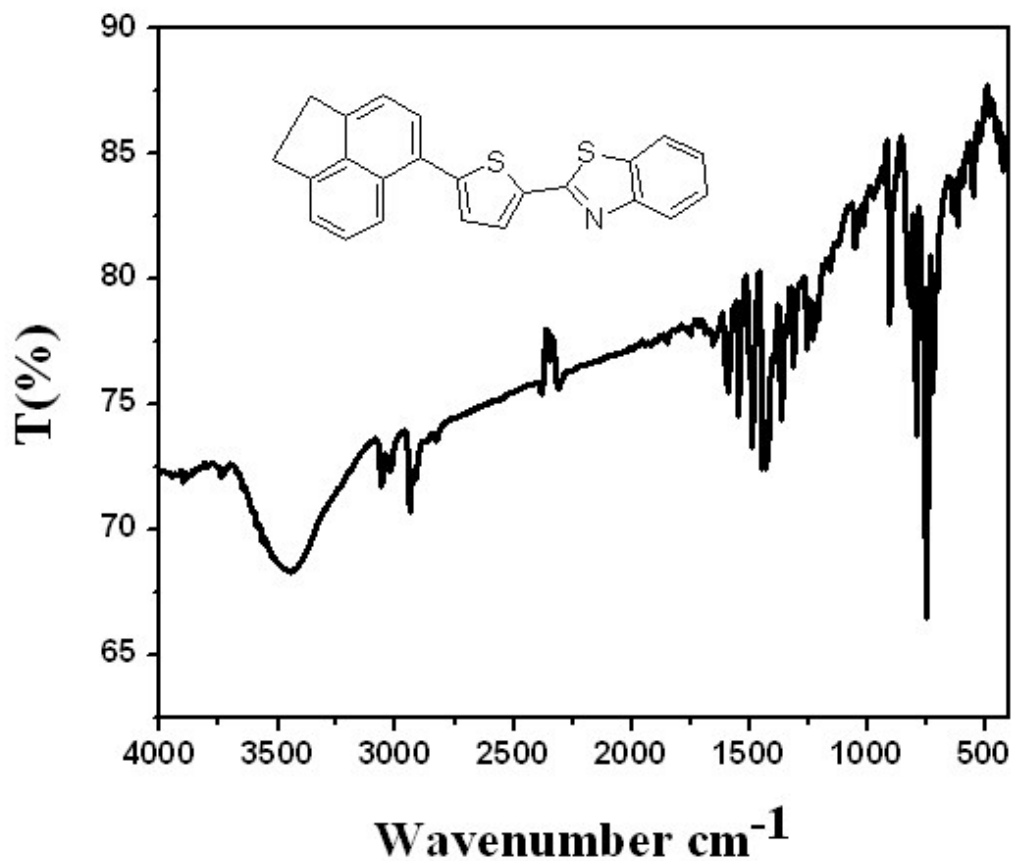

**Figure S47. IR spectrum of DTBT**

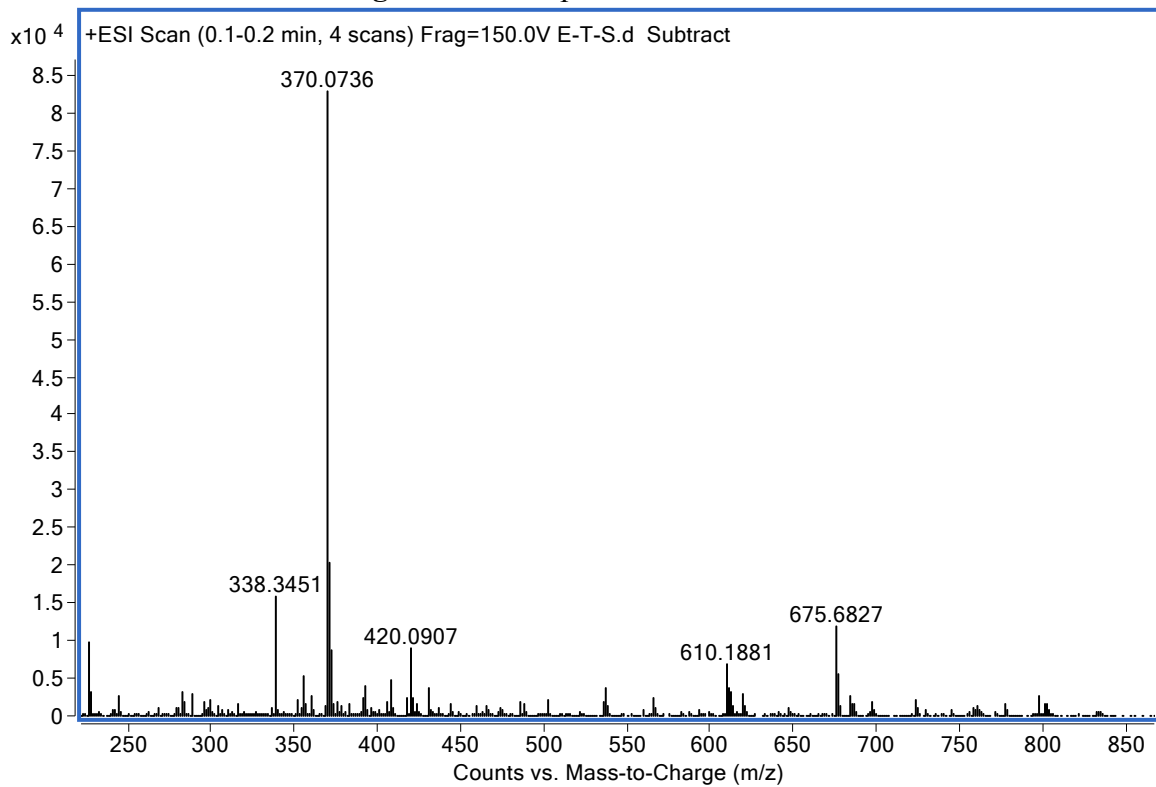

**Figure S48. GC-MS of DTBT**

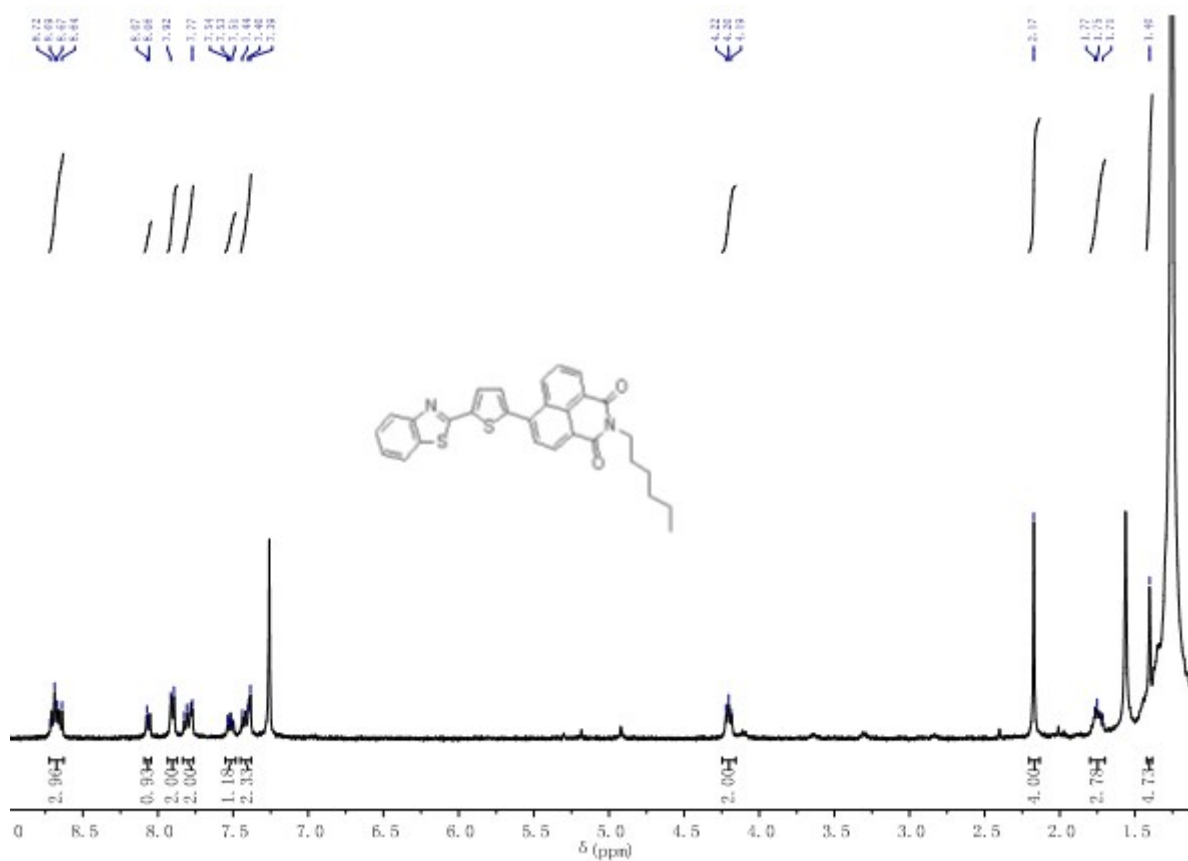

Figure S49. <sup>1</sup>H NMR spectrum of NTBT

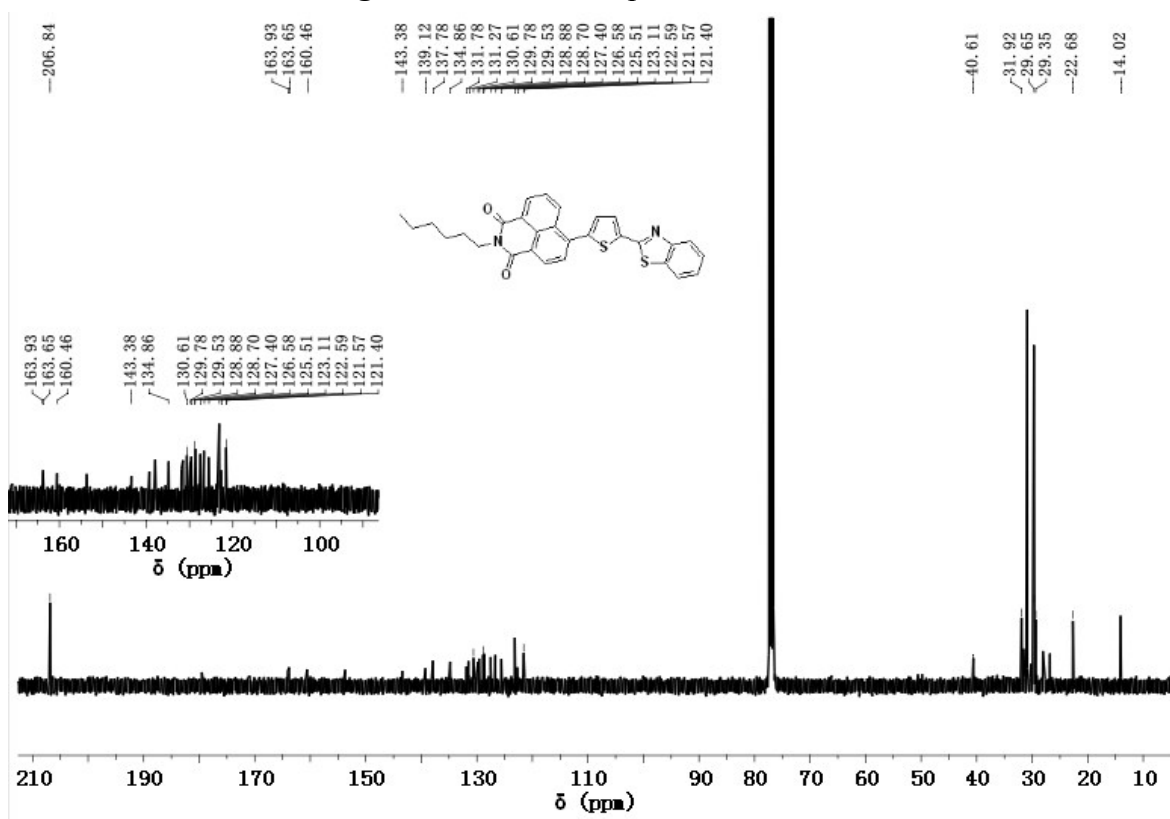

Figure S50. <sup>13</sup>C NMR spectrum of NTBT

Multiple Spectra Report

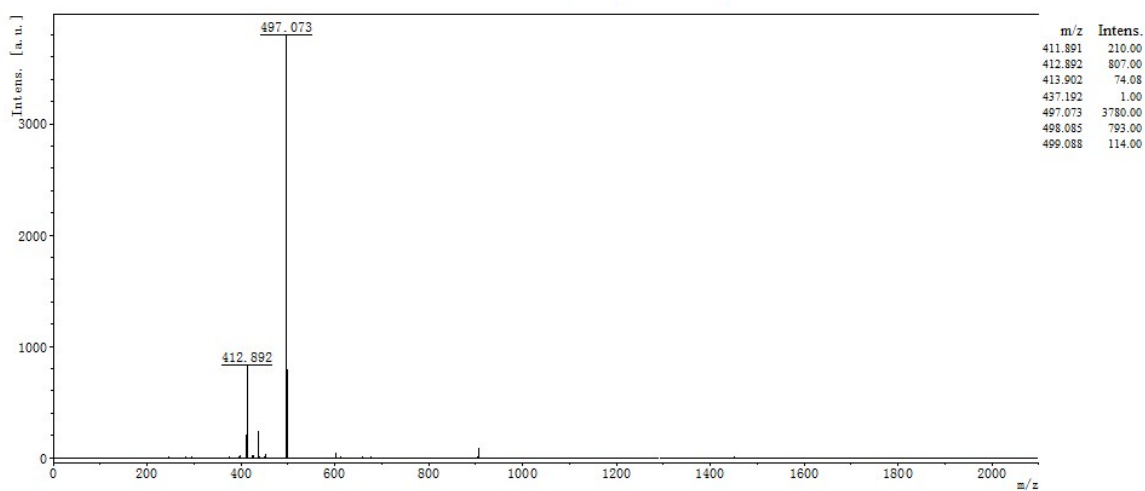

Acquisition Parameter

Figure S51. MALDI-TOF mass spectrum of NTBT

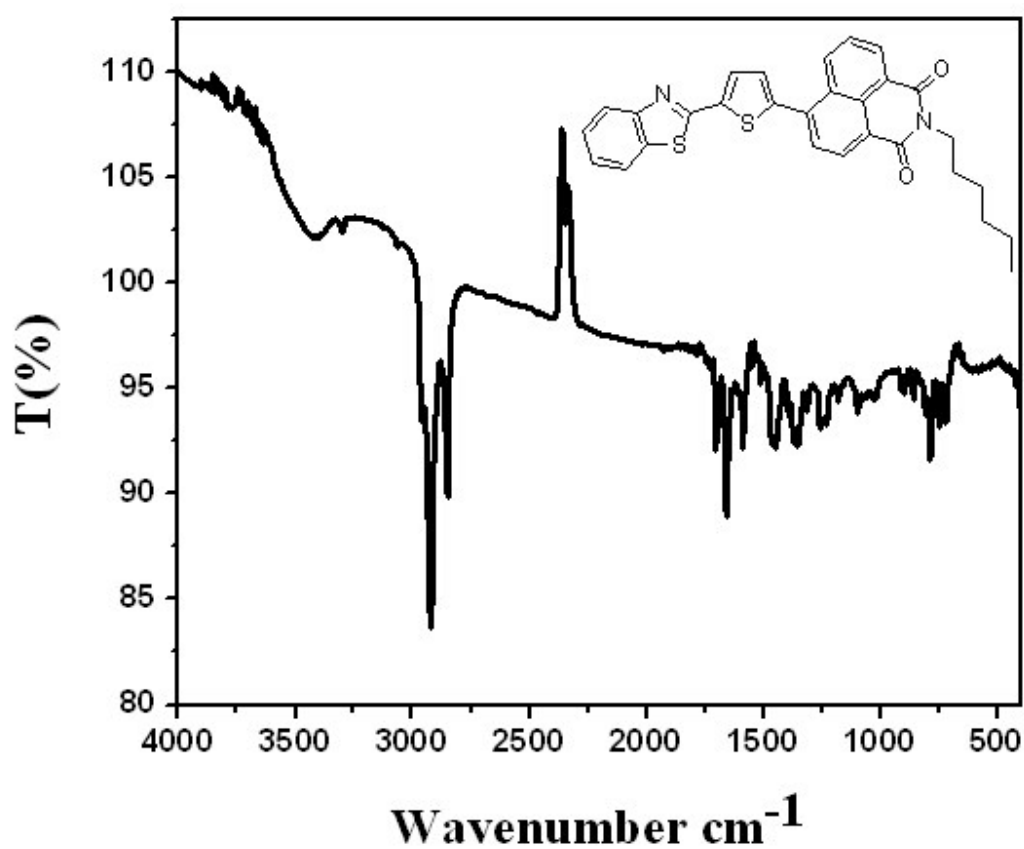

Figure S52. IR spectrum of NTBT
